# Supplementary material for: The copper-catalyzed selective monoalkylation of active methylene compounds with alkylsilyl peroxides
Source: Royal Society of Chemistry journal article supplement (doi:10.1039/d1ob00075f), 2021-01-01
Supplement: d1ob00075f1.pdf [file d1ob00075f1.pdf]

## Supporting Information

### **The Copper-catalyzed Selective Monoalkylation of Active Methylene Compounds with Alkylsilyl Peroxides**

Jiamin Lv,<sup>a</sup> Weiping Xu,<sup>a</sup> Hanbin Lu,<sup>a</sup> Terumasa Kato,<sup>\*a</sup> Yan Liu,<sup>\*a</sup>  
and Keiji Maruoka<sup>\*a,b</sup>

<sup>a</sup>School of Chemical Engineering and Light Industry,  
Guangdong University of Technology, Guangzhou, 510006, China

<sup>b</sup>Graduate School of Pharmaceutical Sciences,  
Kyoto University, Sakyo, Kyoto, 606-8501, Japan

### **Table of Contents**

|                                                                                            |         |
|--------------------------------------------------------------------------------------------|---------|
| 1. General information.....                                                                | S2      |
| 2. Reaction optimization of the coupling reaction with active methylene compounds<br>..... | S3–S7   |
| 3. General procedure for the coupling reaction with active methylene compounds<br>.....    | S8–S18  |
| 4. Control experiment.....                                                                 | S19     |
| 5. References .....                                                                        | S20     |
| 6. <sup>1</sup> H NMR and <sup>13</sup> C NMR spectra .....                                | S21–S36 |

## 1. General information

$^1\text{H}$  NMR and  $^{13}\text{C}$  NMR spectra were recorded on a Bruker AVANCE III 400 MHz spectrometer (400 MHz for  $^1\text{H}$  NMR and 100 MHz for  $^{13}\text{C}$  NMR) and Bruker AVANCE DPX-500MHz spectrometer (500 MHz for  $^1\text{H}$  NMR, 125 MHz for  $^{13}\text{C}$  NMR). Tetramethylsilane (TMS) was used as an internal standard (0 ppm) for the  $^1\text{H}$  NMR spectra, and  $\text{CDCl}_3$  was used as the internal standard (77.16 ppm) for the  $^{13}\text{C}$  NMR spectra. High-resolution mass spectra (HRMS) were recorded on a ThermoFisher Q-Exactive Orbitrap spectrometer with an electrospray ionization (ESI) and an atmospheric-pressure chemical ionization (APCI). Infrared (IR) spectra were obtained on a Thermo-Filsher Nicolet 6700 spectrometer. All the reactions were performed under argon atmosphere. Reactions were monitored by thin-layer chromatography (TLC, silica gel HSGF 254, 0.2-0.3 mm). Reaction products were purified by column chromatography on silica gel (Qingdao Haiyang Chemical Co., Ltd., zcx-II, 300-400 mesh). Copper(I) iodide (98%, Aladdin Chemicals, Shanghai, China) was used as received. Commercially available reagents were used as received. Peroxides **2a**<sup>1</sup>, **2b**<sup>1</sup>, **2c**<sup>1</sup>, **2d**<sup>1</sup>, **2e**<sup>1</sup>, **2f**<sup>2</sup> and **2g**<sup>1</sup> were prepared according to the previous literatures. Active methylene compound **1e** was prepared according to the literature<sup>3</sup>.

## 2. Reaction optimization of the coupling reaction with active methylene compounds

Table S1. The effect of catalyst<sup>a</sup>

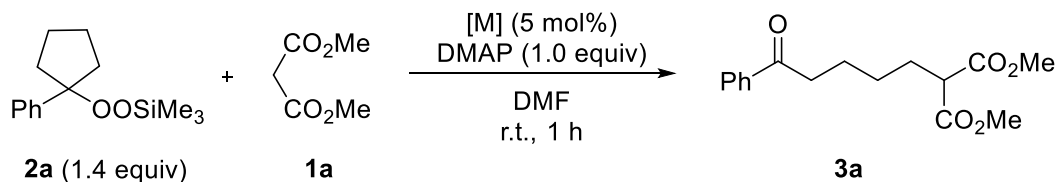

| Entry           | Catalyst                           | Yield <sup>b</sup> (%) |
|-----------------|------------------------------------|------------------------|
| 1               | CuI                                | >99                    |
| 2               | CuBr                               | 98                     |
| 3               | CuCl                               | 99                     |
| 4               | CuOAc                              | 99                     |
| 5               | CuBr <sub>2</sub>                  | 79                     |
| 6               | Cu(OAc) <sub>2</sub>               | 60                     |
| 7               | FeCl <sub>2</sub>                  | 0                      |
| 8               | FeCl <sub>3</sub>                  | 0                      |
| 9               | Pd(PPh <sub>3</sub> ) <sub>4</sub> | 0                      |
| 10              | Pd(OAc) <sub>2</sub>               | 0                      |
| 11              | NiBr <sub>2</sub>                  | 0                      |
| 14 <sup>c</sup> | CuI                                | 63                     |

<sup>a</sup>Reactions were carried out in the presence of **1a** (0.2 mmol), **2a** (0.28 mmol), DMAP (0.2 mmol) and catalyst (5 mol%) in dry DMF (2.0 mL) at room temperature for 1 h under argon atmosphere. <sup>b</sup>The yield of **3a** was determined by <sup>1</sup>H NMR spectroscopy using nitromethane (CH<sub>3</sub>NO<sub>2</sub>) as an internal standard. <sup>c</sup>1,10-Phen (5 mol%) was used instead of DMAP.

**Table S2. The effect of solvents and temperature<sup>a</sup>**

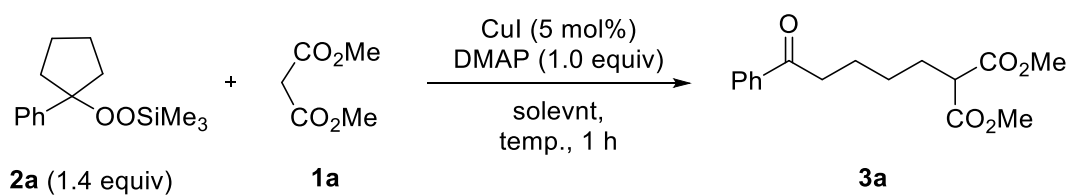

| Entry           | Solvent                       | Temp. (°C) | Yield <sup>b</sup> (%) |
|-----------------|-------------------------------|------------|------------------------|
| 1               | C <sub>6</sub> H <sub>6</sub> | r.t.       | 62                     |
| 2               | DCE                           | r.t.       | 20                     |
| 3               | THF                           | r.t.       | 74                     |
| 4               | AcOEt                         | r.t.       | 33                     |
| 5               | MeCN                          | r.t.       | 0                      |
| 6               | DMSO                          | r.t.       | >99                    |
| 7               | DMF                           | r.t.       | >99                    |
| 8               | DMF                           | 50         | >99                    |
| 9 <sup>c</sup>  | DMF                           | 25         | > 99                   |
| 10 <sup>d</sup> | DMF                           | 0          | 40                     |

<sup>a</sup>Reactions were carried out in the presence of **1a** (0.2 mmol), **2a** (0.28 mmol), DMAP (0.2 mmol) and CuI (5 mol%) in solvent (2 mL) at 0~50 °C for 1 h under argon atmosphere. <sup>b</sup>The yield of **3a** was determined by <sup>1</sup>H NMR spectroscopy using CH<sub>3</sub>NO<sub>2</sub> as an internal standard. <sup>c</sup>Constant temperature bath was used. <sup>d</sup>For 4 h.

**Table S3. The effect of the ratio between alkylsilyl peroxide and active methylene compound<sup>a</sup>**

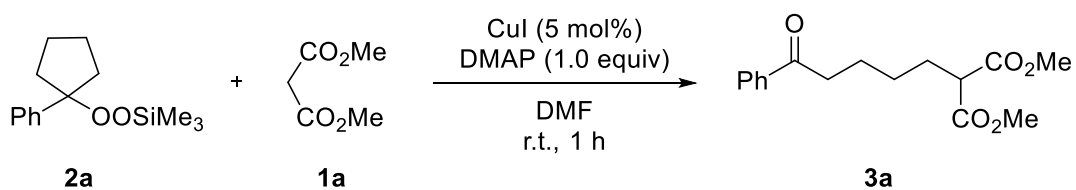

| Entry          | <b>2a</b> (equiv) | <b>1a</b> (equiv) | Yield <sup>b</sup> (%) |
|----------------|-------------------|-------------------|------------------------|
| 1              | 1.4               | 1.0               | > 99                   |
| 2              | 1.2               | 1.0               | 76                     |
| 3              | 1.0               | 1.0               | 80                     |
| 4              | 1.0               | 1.2               | 79                     |
| 5              | 1.0               | 1.5               | 88                     |
| 6 <sup>c</sup> | 1.0               | 1.5               | 88                     |

<sup>a</sup>Reactions of **1a** and **2a** (1.0 equiv = 0.2 mmol) were carried out in the presence of DMAP (0.2 mmol) and CuI (5 mol%) in DMF (2.0 mL) at room temperature for 1 h under argon atmosphere.

<sup>b</sup>The yield of **3a** was determined by <sup>1</sup>H NMR spectroscopy using CH<sub>3</sub>NO<sub>2</sub> as an internal standard. <sup>c</sup>DMAP (1.5 equiv).

**Table S4. Optimization of the reaction of 2a with 1b**

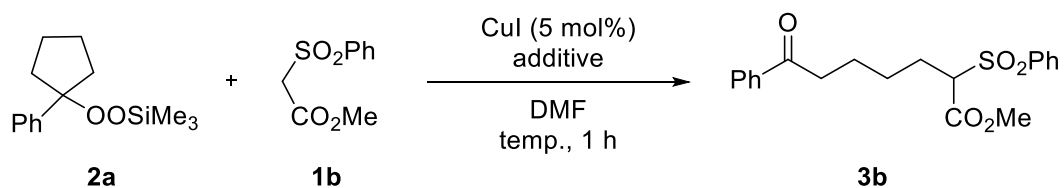

| Entry | Additive           | DMF (mol/L) | Temp. (°C) | Yield <sup>b</sup> (%) |
|-------|--------------------|-------------|------------|------------------------|
| 1     | DMAP (1.0 equiv)   | 0.1         | r.t.       | 93                     |
| 2     | DMAP (1.0 equiv)   | 0.1         | 50         | 78                     |
| 3     | DMAP (1.0 equiv)   | 0.1         | 80         | 63                     |
| 4     | DMAP (1.0 equiv)   | 0.2         | r.t.       | 96                     |
| 5     | DMAP (1.0 equiv)   | 0.2         | 50         | 96                     |
| 6     | DMAP (1.5 equiv)   | 0.1         | 50         | 83                     |
| 7     | 1,10-Phen (5 mol%) | 0.1         | 50         | 78                     |

<sup>a</sup>Reactions **1b** (0.2 mmol) and **2a** (0.28 mmol) were carried out in the presence of CuI (5 mol%) and additive in DMF at room temperature ~80 °C for 1 h under argon atmosphere. <sup>b</sup>The yield of **3b** as determined by <sup>1</sup>H NMR spectroscopy using CH<sub>3</sub>NO<sub>2</sub> as an internal standard.

**Table S5. Optimization of the reaction of 2a with 1d**

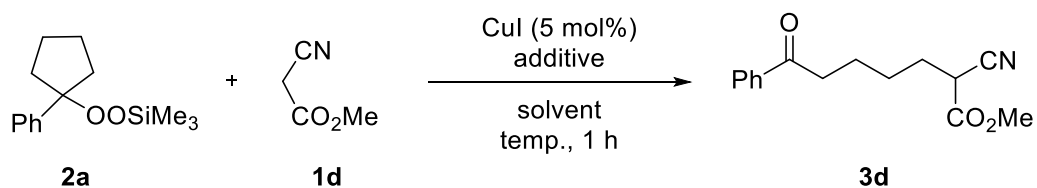

| Entry          | Additive           | Solvent (mol/L) | Temp. (°C) | Yield <sup>b</sup> (%) |
|----------------|--------------------|-----------------|------------|------------------------|
| 1              | DMAP (1.0 equiv)   | DMF (0.2)       | r.t.       | 36                     |
| 2              | DMAP (1.0 equiv)   | DMF (0.2)       | 50         | 52                     |
| 3              | DMAP (1.0 equiv)   | DMF (0.1)       | r.t.       | 56                     |
| 4              | 1,10-Phen (5 mol%) | DMF (0.1)       | r.t.       | 46                     |
| 5 <sup>c</sup> | 1,10-Phen (5 mol%) | DMF (0.1)       | r.t.       | 25                     |
| 6 <sup>c</sup> | DMAP (1.0 equiv)   | DMF (0.1)       | 50         | 44                     |
| 7              | DMAP (1.0 equiv)   | THF (0.1)       | r.t.       | 56                     |
| 8              | DMAP (1.0 equiv)   | THF (0.1)       | 50         | 49                     |
| 9              | DMAP (1.0 equiv)   | MeCN (0.1)      | r.t.       | 40                     |
| 10             | DMAP (1.0 equiv)   | MeCN (0.1)      | 50         | 24                     |

<sup>a</sup>Reactions were carried out in the presence of **2e** (0.2 mmol) and **1a** (0.28 mmol), CuI (5 mol%) and additive in solvent for 1 h under argon atmosphere. <sup>b</sup>The yield of **3e** as determined by <sup>1</sup>H NMR spectroscopy using CH<sub>3</sub>NO<sub>2</sub> as an internal standard. <sup>c</sup>**1a** (0.4 mmol, 2.0 equiv) was used.

### 3. General procedure for the coupling reaction with active methylene compounds

#### I. Reaction of alkylsilyl peroxide **2a** with dimethyl malonate **1a** (table 1, entry 4)

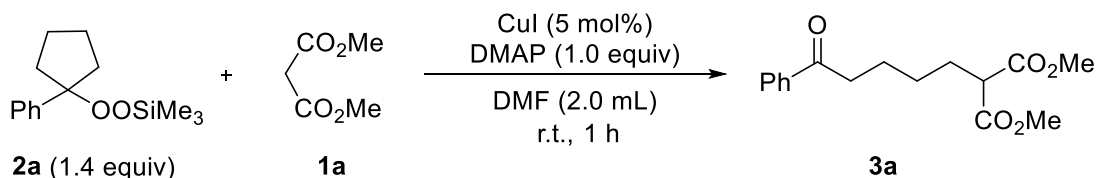

A solution of CuI (1.9 mg, 5 mol%), 4-dimethylaminopyridine (DMAP, 24.4 mg, 1.0 equiv), dimethyl malonate **1a** (26.4 mg, 0.2 mmol) in dry DMF (1.0 mL) was stirred for 10 min at room temperature under argon atmosphere. To the solution was added the solution of alkylsilyl peroxide **2a** (70.0 mg, 1.4 equiv) in dry DMF (1.0 mL) was added dropwise and the reaction mixture was stirred for 1 h. The mixture was then diluted with ethyl acetate/hexane (volume ratio, 1:3) and washed with H<sub>2</sub>O three times. The organic layer was filtrated thorough silica pad and the filtrate was concentrated under reduced pressure. The residue was analyzed by <sup>1</sup>H NMR for the determination of NMR yield using CH<sub>3</sub>NO<sub>2</sub> as an internal standard. The crude product was purified by flash column chromatography on silica gel (eluted with AcOEt /hexane = 1:5) to afford **3a** in 99% yield.

#### Dimethyl 2-(5-oxo-5-phenylpentyl)malonate (**3a**)

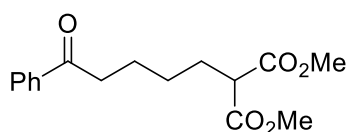

White solid, 99% isolated yield (58.4 mg, 0.20 mmol); <sup>1</sup>H NMR (500 MHz, CDCl<sub>3</sub>): δ 7.95 (d, *J* = 7.0 Hz, 2H), 7.56 (t, *J* = 7.5 Hz, 1H), 7.46 (t, *J* = 8.0 Hz, 2H), 3.74 (s, 6H), 3.39 (t, *J* = 7.5 Hz, 1H), 2.98 (t, *J* = 7.5 Hz, 2H), 1.99–1.94 (m, 2H), 1.81–1.75 (m, 2H), 1.45–1.39 (m, 2H); <sup>13</sup>C NMR (125 MHz, CDCl<sub>3</sub>): δ 199.9, 169.8, 136.9, 133.0, 128.6, 128.0, 52.5, 51.5, 38.1, 28.7, 27.0, 23.7; IR (KBr): 2950, 1754, 1442, 1165, 727, 693 cm<sup>-1</sup>; HRMS (ESI): calcd. for C<sub>16</sub>H<sub>20</sub>NaO<sub>5</sub>: *m/z* 315.1208 [M+Na]<sup>+</sup>, found: 315.1201 [M+Na]<sup>+</sup>.



### Dimethyl 2-methyl-2-(5-oxo-5-phenylpentyl)malonate (5)

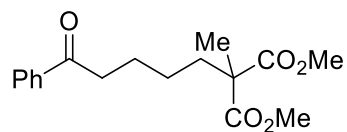

White solid, 25% isolated yield (15.3 mg, 0.05 mmol).  $^1\text{H}$  NMR (500 MHz,  $\text{CDCl}_3$ ):  $\delta$  7.95 (d,  $J = 7.2$  Hz, 2H), 7.56 (t,  $J = 7.4$  Hz, 1H), 7.46 (t,  $J = 7.6$  Hz, 2H), 3.72 (s, 6H), 2.98 (t,  $J = 7.3$  Hz, 2H), 1.94–1.91 (m, 2H), 1.78–1.73 (m, 2H), 1.42 (s, 3H), 1.34–1.30 (m, 2H);  $^{13}\text{C}$  NMR (125 MHz,  $\text{CDCl}_3$ ):  $\delta$  200.0, 172.8, 137.0, 133.0, 128.6, 128.0, 53.7, 52.5, 38.2, 35.5, 24.3, 24.1, 20.0; IR (KBr): 1727, 1465, 1368, 1220, 1166, 728, 687  $\text{cm}^{-1}$ ; HRMS (ESI): calcd. for  $\text{C}_{17}\text{H}_{22}\text{NaO}_5$ :  $m/z$  329.1365  $[\text{M}+\text{Na}]^+$ , found:  $m/z$  329.1356.

### Dimethyl 2,2-bis(5-oxo-5-phenylpentyl)malonate (6)

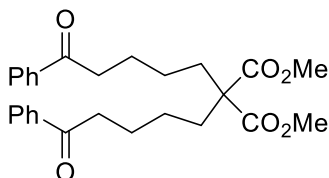

Colorless oil, 15% isolated yield (13.6 mg, 0.030 mmol).  $^1\text{H}$  NMR (400 MHz,  $\text{CDCl}_3$ ):  $\delta$  7.94 (d,  $J = 7.4$  Hz, 4H), 7.55 (t,  $J = 7.4$  Hz, 2H), 7.45 (t,  $J = 7.6$  Hz, 4H), 3.70 (s, 6H), 2.97 (t,  $J = 7.6$  Hz, 4H), 1.96–1.92 (m, 4H), 1.77–1.73 (m, 4H), 1.29–1.26 (m, 4H);  $^{13}\text{C}$  NMR (100 MHz,  $\text{CDCl}_3$ ):  $\delta$  199.9, 172.2, 137.0, 133.0, 128.6, 128.0, 57.6, 52.4, 38.1, 32.4, 24.3, 23.9; IR (KBr): 1732, 1682, 1448, 753, 691  $\text{cm}^{-1}$ ; HRMS (APCI): calcd. for  $\text{C}_{27}\text{H}_{33}\text{O}_6$ :  $m/z$  453.2277  $[\text{M}+\text{H}]^+$ , found: 453.2264  $[\text{M}+\text{H}]^+$ .

## II. Reaction of alkylsilyl peroxide **2** with active methylene compound **1** (table 2, table3, and scheme 2)

To a solution of CuI (1.9 mg, 5 mol%), DMAP (24.4 mg, 1.0 equiv), active methylene compound **1** (0.2 mmol) in dry DMF (0.5 mL) was added the solution of alkylsilyl peroxide **2** (1.4 equiv) in dry DMF (0.5 mL) at indicated temperature and the reaction mixture was stirred at the same temperature for 1 h. The reaction mixture was then diluted with ethyl acetate/hexane (volume ratio, 1:3) and washed with H<sub>2</sub>O three times. The organic layer was dried over Na<sub>2</sub>SO<sub>4</sub>, filtrated and concentrated under reduced pressure. The residue was analyzed by <sup>1</sup>H NMR for the determination of NMR yield using CH<sub>3</sub>NO<sub>2</sub> as an internal standard. The crude product was purified by flash column chromatography on silica gel (eluted with AcOEt/hexane = 1:5) to obtain corresponding products.

Unless otherwise noted, reactions in tables 2 and 3 were performed at room temperature and 50 °C, respectively.

### Methyl 7-oxo-7-phenyl-2-(phenylsulfonyl)heptanoate (**3b**)

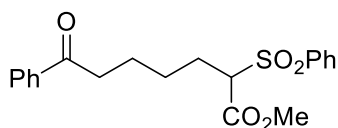

Yellow oil, 91% isolated yield (68.3 mg, 0.18 mmol). <sup>1</sup>H NMR (400 MHz, CDCl<sub>3</sub>): δ 7.86–7.73 (m, 4H), 7.60 (t, *J* = 7.4 Hz, 1H), 7.51–7.45 (m, 3H), 7.36 (t, *J* = 7.6 Hz, 2H), 3.92–3.89 (m, 1H), 3.57 (s, 3H), 2.86 (t, *J* = 7.2 Hz, 2H), 2.00–1.92 (m, 2H), 1.71–1.60 (m, 2H), 1.35–1.31 (m, 2H); <sup>13</sup>C NMR (100 MHz, CDCl<sub>3</sub>): δ 199.6, 166.4, 137.0, 136.8, 134.4, 133.1, 129.3, 129.1, 128.6, 128.0, 70.6, 53.0, 37.8, 26.6, 26.5, 23.4; IR (KBr): 1740, 1447, 1323, 757, 689 cm<sup>-1</sup>; HRMS (ESI): calcd. for C<sub>20</sub>H<sub>22</sub>NaO<sub>5</sub>S: *m/z* 397.1086 [M+Na]<sup>+</sup>, found: 397.1078 [M+Na]<sup>+</sup>.

### Methyl 2-acetyl-7-oxo-7-phenylheptanoate (**3c**)

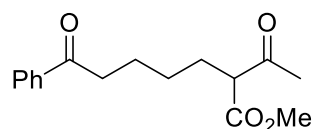

Performed at 50 °C. White solid, 45% isolated yield. (25.2 mg, 0.091 mmol). <sup>1</sup>H NMR (400 MHz, CDCl<sub>3</sub>): δ 7.94 (d, *J* = 7.2 Hz, 2H), 7.55 (t, *J* = 7.2 Hz, 1H), 7.46 (t, *J* = 7.6 Hz, 2H), 3.74 (s, 3H), 3.46 (t, *J* = 7.2 Hz, 1H), 2.98 (t, *J* = 7.2 Hz, 2H), 2.23 (s, 3H), 1.93–1.87 (m, 2H), 1.79–1.73 (m, 2H), 1.42–1.36 (m, 2H); <sup>13</sup>C NMR (100 MHz,

CDCl<sub>3</sub>):  $\delta$  203.3, 199.9, 170.3, 136.9, 133.0, 128.6, 128.0, 59.4, 52.4, 38.1, 29.0, 28.0, 27.1, 23.8; IR (KBr): 1715, 1461, 1207, 731, 692 cm<sup>-1</sup>; HRMS (ESI): calcd. for C<sub>16</sub>H<sub>20</sub>NaO<sub>4</sub>: m/z 299.1259 [M+Na]<sup>+</sup>, found: 299.1251 [M+Na]<sup>+</sup>.

### Methyl 2-cyano-7-oxo-7-phenylheptanoate (3d)

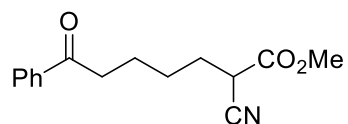

White solid, 48% isolated yield (24.8 mg, 0.10 mmol). <sup>1</sup>H NMR (400 MHz, CDCl<sub>3</sub>):  $\delta$  7.95 (d,  $J$  = 7.2 Hz, 2H), 7.57 (t,  $J$  = 7.2 Hz, 1H), 7.47 (t,  $J$  = 7.6 Hz, 2H), 3.82 (s, 3H), 3.55 (t,  $J$  = 8.0 Hz, 1H), 3.02 (t,  $J$  = 7.2 Hz, 2H), 2.05–1.99 (m, 2H), 1.84–1.78 (m, 2H), 1.65–1.58 (m, 2H); <sup>13</sup>C NMR (100 MHz, CDCl<sub>3</sub>):  $\delta$  199.5, 166.6, 136.8, 133.1, 128.7, 128.0, 116.4, 53.5, 37.9, 37.3, 29.7, 26.5, 23.2; IR (KBr): 2249, 1747, 1682, 1179, 751, 691 cm<sup>-1</sup>; HRMS (ESI): calcd. for C<sub>15</sub>H<sub>16</sub>NO<sub>3</sub>: m/z 258.1130 [M-H]<sup>-</sup>, found: 258.1134 [M-H]<sup>-</sup>.

### Methyl 2-(diethylcarbamoyl)-7-oxo-7-phenylheptanoate (3e)

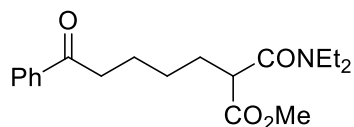

Performed at 50 °C. Yellow oil, 63% isolated yield (40.0 mg, 0.13 mmol). <sup>1</sup>H NMR (500 MHz, CDCl<sub>3</sub>):  $\delta$  7.95 (d,  $J$  = 7.5 Hz, 2H), 7.55 (t,  $J$  = 7.4 Hz, 1H), 7.46 (t,  $J$  = 7.7 Hz, 2H), 3.71 (s, 3H), 3.55 (t,  $J$  = 7.2 Hz, 1H), 3.45–3.32 (m, 4H), 2.99 (t,  $J$  = 7.2, 2H), 2.02–1.97 (m, 2H), 1.81–1.75 (m, 2H), 1.44–1.37 (m, 2H), 1.20 (t,  $J$  = 7.1 Hz, 3H), 1.12 (t,  $J$  = 7.1 Hz, 3H); <sup>13</sup>C NMR (125 MHz, CDCl<sub>3</sub>):  $\delta$  200.2, 170.6, 167.8, 136.9, 133.0, 128.6, 128.0, 52.4, 48.7, 42.2, 40.7, 38.1, 29.3, 27.2, 24.0, 14.5, 12.8; IR (KBr): 1744, 1684, 1643, 1448, 1219, 755, 692 cm<sup>-1</sup>; HRMS (ESI): calcd. for C<sub>19</sub>H<sub>27</sub>NaNO<sub>4</sub>: m/z 356.1838 [M+Na]<sup>+</sup>, found: 356.1829 [M+Na]<sup>+</sup>.

### 1-Phenyl-6,6-bis(phenylsulfonyl)hexan-1-one (3f)

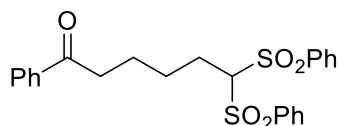

Performed at 50 °C. Colorless oil, 63% isolated yield (57.5 mg, 0.13 mmol). <sup>1</sup>H NMR (500 MHz, CDCl<sub>3</sub>):  $\delta$  7.96 (d,  $J$  = 7.5 Hz, 4H), 7.93 (d,  $J$  = 7.3 Hz, 2H), 7.68 (t,  $J$  = 7.5 Hz, 2H), 7.58–7.55 (m, 5H), 7.47 (t,  $J$  = 7.7 Hz, 2H), 4.49 (t,  $J$  = 5.6 Hz, 1H), 2.94–2.92

(m, 2H), 2.21–2.19 (m, 2H), 1.69–1.67 (m, 4H);  $^{13}\text{C}$  NMR (125 MHz,  $\text{CDCl}_3$ ):  $\delta$  199.5, 138.4, 137.9, 136.8, 134.9, 134.6, 133.2, 129.6, 129.4, 129.2, 128.9, 128.7, 128.0, 83.3, 37.6, 27.5, 25.5, 23.1; IR (KBr): 1682, 1330, 752, 688  $\text{cm}^{-1}$ . HRMS (ESI): calcd. for  $\text{C}_{24}\text{H}_{24}\text{NaO}_5\text{S}_2$ :  $m/z$  479.0963  $[\text{M}+\text{Na}]^+$ , found: 479.0956  $[\text{M}+\text{Na}]^+$ .

### Methyl 4-(1-methoxy-1,7-dioxo-7-phenylheptan-2-yl)benzoate (3g)

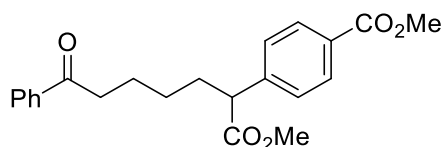

Yellow solid, 80% isolated yield (59.0 mg, 0.16 mmol).  $^1\text{H}$  NMR (500 MHz,  $\text{CDCl}_3$ ):  $\delta$  7.99 (d,  $J = 8.3$  Hz, 2H), 7.92 (d,  $J = 7.0$  Hz, 2H), 7.55 (t,  $J = 7.5$  Hz, 1H), 7.44 (t,  $J = 7.7$  Hz, 2H), 7.38 (d,  $J = 8.3$  Hz, 2H), 3.90 (s, 3H), 3.66 (s, 3H), 3.63 (t,  $J = 7.7$  Hz, 1H), 2.95–2.92 (m, 2H), 2.19–2.11 (m, 1H), 1.88–1.80 (m, 1H), 1.78–1.72 (m, 2H), 1.38–1.32 (m, 2H);  $^{13}\text{C}$  NMR (125 MHz,  $\text{CDCl}_3$ ):  $\delta$  200.0, 173.8, 166.8, 144.2, 136.9, 133.0, 123.0, 129.2, 128.6, 128.1, 128.0, 52.2, 52.1, 51.4, 38.2, 33.2, 27.2, 23.8; IR (KBr): 1717, 1376, 1207, 1166, 867, 743, 725, 703, 690  $\text{cm}^{-1}$ ; HRMS (ESI): calcd. for  $\text{C}_{22}\text{H}_{24}\text{NaO}_5$ :  $m/z$  391.1521  $[\text{M}+\text{Na}]^+$ , found: 391.1514  $[\text{M}+\text{Na}]^+$ .

### 6,6-Bis(4-nitrophenyl)-1-phenylhexan-1-one (3h)

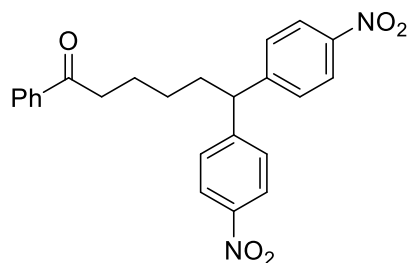

Performed at 50  $^\circ\text{C}$ . Colorless oil, 27% isolated yield (22.3 mg, 0.054 mmol);  $^1\text{H}$  NMR (400 MHz,  $\text{CDCl}_3$ ):  $\delta$  8.17 (d,  $J = 8.4$  Hz, 4H), 7.91 (d,  $J = 7.9$  Hz, 2H), 7.56 (t,  $J = 7.1$  Hz, 1H), 7.45 (t,  $J = 7.6$  Hz, 2H), 7.38 (d,  $J = 8.4$  Hz, 4H), 4.16 (t,  $J = 7.8$  Hz, 1H), 2.95 (t,  $J = 7.0$  Hz, 2H), 2.20–2.14 (m, 2H), 1.85–1.78 (m, 2H), 1.39–1.31 (m, 2H);  $^{13}\text{C}$  NMR (100 MHz,  $\text{CDCl}_3$ ):  $\delta$  199.8, 150.7, 146.9, 136.9, 133.2, 128.7, 128.6, 128.0, 124.1, 50.8, 38.1, 35.0, 29.7, 27.4, 23.8; IR (KBr): 1717, 1518, 1457, 856, 830, 746, 691  $\text{cm}^{-1}$ ; HRMS (ESI): calcd. for  $\text{C}_{24}\text{H}_{21}\text{N}_2\text{O}_5$ :  $m/z$  417.1450  $[\text{M}-\text{H}]^-$ , found: 417.1459  $[\text{M}-\text{H}]^-$ .

### Dimethyl 2-(6-oxo-6-phenylhexyl)malonate (7b)

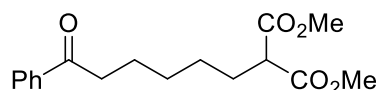

White solid, 62% isolated yield (37.9 mg, 0.12 mmol).  $^1\text{H}$  NMR (500 MHz,  $\text{CDCl}_3$ ):  $\delta$  7.95 (d,  $J = 7.5$  Hz, 2H), 7.56 (t,  $J = 7.0$  Hz, 1H), 7.46 (t,  $J = 7.7$  Hz, 2H), 3.74 (s, 6H), 3.37 (t,  $J = 7.5$  Hz, 1H), 2.96 (t,  $J = 7.3$  Hz, 2H), 1.95–1.90 (m, 2H), 1.78–1.72 (m, 2H), 1.44–1.35 (m, 4H);  $^{13}\text{C}$  NMR (125 MHz,  $\text{CDCl}_3$ ):  $\delta$  200.3, 169.9, 137.0, 133.0, 128.6, 128.0, 52.5, 51.6, 38.3, 28.9, 28.7, 27.2, 23.9; IR (KBr): 1470, 1373, 1193, 1159, 750, 729, 688  $\text{cm}^{-1}$ ; HRMS (ESI): calcd. for  $\text{C}_{17}\text{H}_{22}\text{NaO}_5$ :  $m/z$  329.1365  $[\text{M}+\text{Na}]^+$ , found: 329.1355  $[\text{M}+\text{Na}]^+$ .

### Methyl 4-(1-methoxy-1,8-dioxo-8-phenyloctan-2-yl)benzoate (8b)

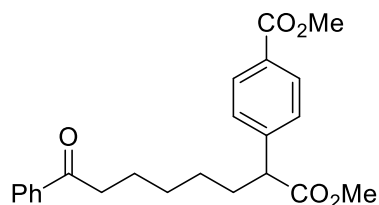

Performed at room temperature. Colorless oil, 56% isolated yield (42.8 mg, 0.11 mmol).  $^1\text{H}$  NMR (400 MHz,  $\text{CDCl}_3$ ):  $\delta$  7.98 (d,  $J = 8.4$  Hz, 2H), 7.93 (d,  $J = 7.2$  Hz, 2H), 7.55 (t,  $J = 7.4$  Hz, 1H), 7.45 (t,  $J = 7.6$  Hz, 2H), 7.37 (d,  $J = 8.3$  Hz, 2H), 3.90 (s, 3H), 3.66 (s, 3H), 3.61 (t,  $J = 8.0$  Hz, 1H), 2.93 (t,  $J = 7.2$  Hz, 2H), 2.15–2.06 (m, 1H), 1.84–1.76 (m, 1H), 1.73–1.67 (m, 2H), 1.42–1.36 (m, 2H), 1.34–1.20 (m, 2H);  $^{13}\text{C}$  NMR (100 MHz,  $\text{CDCl}_3$ ):  $\delta$  200.4, 173.9, 167.0, 144.4, 137.1, 133.0, 132.8, 130.0, 129.2, 128.6, 128.0, 52.1, 51.6, 38.3, 33.2, 29.0, 27.3, 24.0; IR (KBr): 2926, 1724, 1611, 1448, 855, 747, 691  $\text{cm}^{-1}$ ; HRMS (ESI): calcd. for  $\text{C}_{23}\text{H}_{26}\text{NaO}_5$ :  $m/z$  405.1678  $[\text{M}+\text{Na}]^+$ , found: 405.1671  $[\text{M}+\text{Na}]^+$ .

### Dimethyl 2-(2-(3-oxo-3-phenylpropoxy)ethyl)malonate (7c)

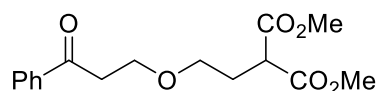

Colorless oil, 55% isolated yield (33.9 mg, 0.11 mmol).  $^1\text{H}$  NMR (400 MHz,  $\text{CDCl}_3$ ):  $\delta$  7.98–7.93 (m, 2H), 7.59–7.53 (m, 1H), 7.47 (t,  $J = 7.6$  Hz, 2H), 3.83 (t,  $J = 6.4$  Hz, 2H), 3.71 (s, 6H), 3.59–3.49 (m, 3H), 3.21 (t,  $J = 6.4$  Hz, 2H), 2.19–2.15 (m, 2H);  $^{13}\text{C}$  NMR (100 MHz,  $\text{CDCl}_3$ ):  $\delta$  198.2, 169.8, 168.9, 137.0, 133.2, 128.6, 128.1, 68.2, 66.1, 52.5,

48.6, 38.7, 28.9; IR (KBr): 1735, 1448, 1259, 1157, 750, 692  $\text{cm}^{-1}$ ; HRMS (ESI): calcd. for  $\text{C}_{16}\text{H}_{20}\text{NaO}_6$ :  $m/z$  331.1158  $[\text{M}+\text{Na}]^+$ , found: 331.1150  $[\text{M}+\text{Na}]^+$ .

#### Methyl 4-(3-oxo-3-phenylpropoxy)-2-(phenylsulfonyl)butanoate (9c)

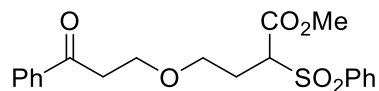

Yellow oil, 80% isolated yield (61.5 mg, 0.16 mmol).  $^1\text{H}$  NMR (400 MHz,  $\text{CDCl}_3$ ):  $\delta$  7.93 (d,  $J = 7.2$  Hz, 2H), 7.86 (d,  $J = 7.2$  Hz, 2H), 7.67 (t,  $J = 7.6$  Hz, 1H), 7.55 (t,  $J = 8.0$  Hz, 3H), 7.46 (t,  $J = 7.6$  Hz, 2H), 4.17–4.14 (m, 1H), 3.82–3.75 (m, 2H), 3.61–3.56 (m, 4H), 3.49–3.43 (m, 1H), 3.21–3.12 (m, 2H), 2.36–2.30 (m, 1H), 2.25–2.18 (m, 1H);  $^{13}\text{C}$  NMR (100 MHz,  $\text{CDCl}_3$ ):  $\delta$  198.0, 166.2, 137.1, 136.9, 134.3, 133.3, 129.2, 129.1, 128.7, 128.1, 68.1, 67.5, 66.0, 52.9, 38.5, 27.0; IR (KBr): 2873, 1742, 1479, 1323, 1212, 758, 689  $\text{cm}^{-1}$ ; HRMS (ESI): calcd. for  $\text{C}_{20}\text{H}_{22}\text{NaO}_6\text{S}$ :  $m/z$  413.1035  $[\text{M}+\text{Na}]^+$ , found: 413.1025  $[\text{M}+\text{Na}]^+$ .

#### Dimethyl 2-(7-oxo-7-phenylheptyl)malonate (7d)

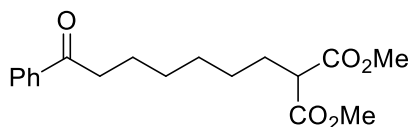

Performed at room temperature. White solid, 92% isolated yield (59.0 mg, 0.18 mmol).  $^1\text{H}$  NMR (400 MHz,  $\text{CDCl}_3$ ):  $\delta$  7.95 (d,  $J = 8.0$  Hz, 2H), 7.55 (t,  $J = 7.4$  Hz, 1H), 7.46 (t,  $J = 7.6$  Hz, 2H), 3.73 (s, 6H), 3.36 (t,  $J = 7.2$  Hz, 1H), 2.96 (t,  $J = 7.4$  Hz, 2H), 1.93–1.88 (m, 2H), 1.75–1.71 (m, 2H), 1.38–1.34 (m, 6H);  $^{13}\text{C}$  NMR (100 MHz,  $\text{CDCl}_3$ ):  $\delta$  200.4, 169.9, 137.0, 132.9, 128.6, 128.0, 52.4, 51.7, 38.5, 29.0, 28.8, 27.2, 24.1; IR (KBr): 1750, 1731, 1466, 1161, 757, 722, 687  $\text{cm}^{-1}$ ; HRMS (ESI): calcd. for  $\text{C}_{18}\text{H}_{24}\text{NaO}_5$ :  $m/z$  343.1521  $[\text{M}+\text{Na}]^+$ , found: 343.1513  $[\text{M}+\text{Na}]^+$ .

#### Methyl 4-(1-methoxy-1,9-dioxo-9-phenylnonan-2-yl)benzoate (8d)

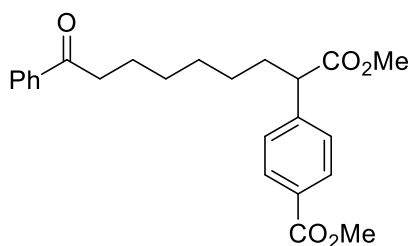

Performed at room temperature. White solid, 75% isolated yield (59.4 mg, 0.15 mmol).

$^1\text{H}$  NMR (500 MHz,  $\text{CDCl}_3$ ):  $\delta$  7.99 (d,  $J = 8.2$  Hz, 2H), 7.94 (d,  $J = 7.3$  Hz, 2H), 7.55 (t,  $J = 7.4$  Hz, 1H), 7.45 (t,  $J = 7.6$  Hz, 2H), 7.37 (d,  $J = 8.3$  Hz, 2H), 3.90 (s, 3H), 3.66 (s, 3H), 3.60 (t,  $J = 7.7$  Hz, 1H), 2.94 (t,  $J = 7.4$  Hz, 2H), 2.09 (m, 1H), 1.88–1.73 (m, 1H), 1.73–1.59 (m, 3H), 1.42–1.32 (m, 5H);  $^{13}\text{C}$  NMR (125 MHz,  $\text{CDCl}_3$ ):  $\delta$  200.5, 173.9, 166.9, 144.3, 137.0, 132.9, 129.9, 129.2, 129.1, 128.6, 128.0, 128.0, 52.2, 52.1, 51.6, 38.5, 33.4, 29.2, 29.1, 27.4, 24.2; IR (KBr): 2851, 1717, 1466, 1203, 1166, 859, 757, 718, 691  $\text{cm}^{-1}$ ; HRMS (ESI): calcd. for  $\text{C}_{24}\text{H}_{28}\text{NaO}_5$ :  $m/z$  419.1834  $[\text{M}+\text{Na}]^+$ , found: 419.1828  $[\text{M}+\text{Na}]^+$ .

#### Methyl 9-oxo-9-phenyl-2-(phenylsulfonyl)nonanoate (9d)

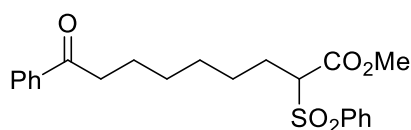

Yellow oil, 64% isolated yield (51.5 mg, 0.13 mmol).  $^1\text{H}$  NMR (400 MHz,  $\text{CDCl}_3$ ):  $\delta$  7.94 (d,  $J = 7.2$  Hz, 2H), 7.87 (d,  $J = 7.2$  Hz, 2H), 7.69 (t,  $J = 7.4$  Hz, 1H), 7.61–7.54 (m, 3H), 7.46 (t,  $J = 7.6$  Hz, 2H), 3.96–3.93 (m, 1H), 3.66 (s, 3H), 2.94 (t,  $J = 7.2$  Hz, 2H), 2.11–1.83 (m, 2H), 1.76–1.58 (m, 2H), 1.38–1.30 (m, 3H);  $^{13}\text{C}$  NMR (100 MHz,  $\text{CDCl}_3$ ):  $\delta$  200.3, 166.5, 137.1, 137.0, 134.3, 133.0, 129.3, 129.1, 128.6, 128.5, 128.0, 70.9, 52.9, 38.4, 28.9, 28.8, 26.8, 26.7, 24.0; IR(KBr): 2923, 1737, 1711, 1462, 1320, 1199, 741, 718, 618  $\text{cm}^{-1}$ ; HRMS (ESI): calcd. for  $\text{C}_{22}\text{H}_{26}\text{NaO}_5\text{S}$ :  $m/z$  425.1399  $[\text{M}+\text{Na}]^+$ , found: 425.1392  $[\text{M}+\text{Na}]^+$ .

#### Dimethyl 2-(5-oxo-5-(4-tolyl)pentyl)malonate (7e)

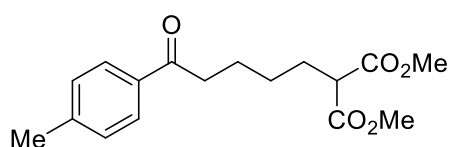

White solid, 77% isolated yield (47.1 mg, 0.15 mmol).  $^1\text{H}$  NMR (500 MHz,  $\text{CDCl}_3$ ):  $\delta$  7.84 (d,  $J = 8.2$  Hz, 2H), 7.25 (d,  $J = 8.1$  Hz, 2H), 3.74 (s, 6H), 3.39 (t,  $J = 7.5$  Hz, 1H), 2.95 (t,  $J = 7.3$  Hz, 2H), 2.41 (s, 3H), 1.98–1.94 (m, 2H), 1.79–1.73 (m, 2H), 1.43–1.40 (m, 2H);  $^{13}\text{C}$  NMR (125 MHz,  $\text{CDCl}_3$ ):  $\delta$  199.6, 169.8, 143.7, 134.5, 129.3, 128.1, 52.5, 51.5, 38.0, 28.7, 27.0, 23.8, 21.6; IR (KBr): 2955, 1751, 1733, 1461, 1163, 822  $\text{cm}^{-1}$ ; HRMS (ESI): calcd. for  $\text{C}_{17}\text{H}_{22}\text{NaO}_5$ :  $m/z$  329.1365  $[\text{M}+\text{Na}]^+$ , found: 329.1359  $[\text{M}+\text{Na}]^+$ .

**Methyl 4-(1-methoxy-1,7-dioxo-7-(4-tolyl)heptan-2-yl)benzoate (8e)**

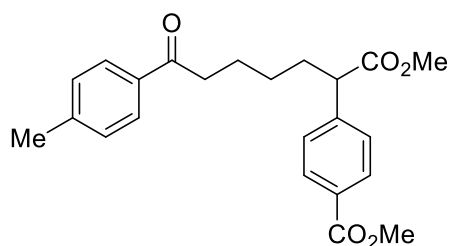

White solid, 73% isolated yield (55.8 mg, 0.15 mmol).  $^1\text{H}$  NMR (500 MHz,  $\text{CDCl}_3$ ):  $\delta$  7.99 (d,  $J = 8.3$  Hz, 2H), 7.82 (d,  $J = 8.2$  Hz, 2H), 7.37 (d,  $J = 8.3$  Hz, 2H), 7.24 (d,  $J = 8.0$  Hz, 2H), 3.91 (s, 3H), 3.66 (s, 3H), 3.63 (t,  $J = 7.7$  Hz, 1H), 2.91 (t,  $J = 7.3$  Hz, 2H), 2.40 (s, 3H), 2.17–2.12 (m, 1H), 1.87–1.79 (m, 1H), 1.76–1.71 (m, 2H), 1.36–1.31 (m, 2H);  $^{13}\text{C}$  NMR (125 MHz,  $\text{CDCl}_3$ ):  $\delta$  199.7, 173.8, 166.9, 144.2, 143.8, 133.4, 130.0, 129.3, 129.2, 128.1, 128.0, 52.2, 52.1, 51.4, 38.1, 33.3, 27.2, 23.9, 21.6; IR (KBr): 2895, 1717, 1466, 1179, 1168, 817  $\text{cm}^{-1}$ ; HRMS (ESI): calcd. for  $\text{C}_{23}\text{H}_{26}\text{NaO}_5$ :  $m/z$  405.1678  $[\text{M}+\text{Na}]^+$ , found: 405.1670  $[\text{M}+\text{Na}]^+$ .

**Dimethyl 2-(5-(4-fluorophenyl)-5-oxopentyl)malonate (7f)**

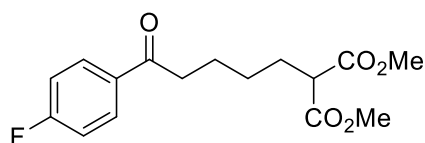

Colorless oil, 76% isolated yield (47.1 mg, 0.15 mmol).  $^1\text{H}$  NMR (400 MHz,  $\text{CDCl}_3$ ):  $\delta$  8.00–7.96 (m, 2H), 7.12 (t,  $J = 8.6$  Hz, 2H), 3.74 (s, 6H), 3.39 (t,  $J = 7.5$  Hz, 1H), 2.95 (t,  $J = 7.2$  Hz, 2H), 1.99–1.93 (m, 2H), 1.81–1.73 (m, 2H), 1.46–1.38 (m, 2H);  $^{13}\text{C}$  NMR (100 MHz,  $\text{CDCl}_3$ ):  $\delta$  198.3, 169.8, 165.7 (d,  $J_{\text{C-F}} = 250.0$  Hz), 133.5, 130.6 (d,  $J_{\text{C-F}} = 9.3$  Hz), 115.7 (d,  $J_{\text{C-F}} = 21.8$  Hz), 52.5, 51.5, 38.0, 28.6, 26.9, 23.6; IR (KBr): 2954, 1735, 1435, 1409, 1156, 838  $\text{cm}^{-1}$ ; HRMS (ESI): calcd. for  $\text{C}_{16}\text{H}_{19}\text{FNaO}_5$ ,  $m/z$  333.1114  $[\text{M}+\text{Na}]^+$ , found: 333.1105  $[\text{M}+\text{Na}]^+$ .



**Methyl 4-(7-(4-fluorophenyl)-1-methoxy-1,7-dioxoheptan-2-yl)benzoate (8f)**

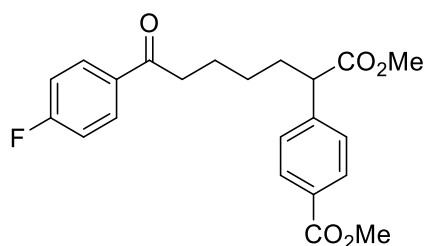

White solid, 50% isolated yield (38.6 mg, 0.10 mmol).  $^1\text{H}$  NMR (500 MHz,  $\text{CDCl}_3$ ):  $\delta$  7.99 (d,  $J = 8.3$  Hz, 2H), 7.95 (d,  $J = 8.2$  Hz, 2H), 7.37 (d,  $J = 8.3$  Hz, 2H), 7.11 (t,  $J = 8.3$  Hz, 2H), 3.91 (s, 3H), 3.66 (s, 3H), 3.63 (t,  $J = 7.7$  Hz, 1H), 2.91 (t,  $J = 7.3$  Hz, 2H), 2.20–2.11 (m, 1H), 1.87–1.81 (m, 1H), 1.78–1.71 (m, 3H), 1.36–1.32 (m, 1H);  $^{13}\text{C}$  NMR (125 MHz,  $\text{CDCl}_3$ ):  $\delta$  198.3, 173.8, 166.8, 165.7 (d,  $J_{\text{C-F}} = 252.9$  Hz), 144.1, 133.3 (d,  $J_{\text{C-F}} = 3.0$  Hz), 130.6 (d,  $J_{\text{C-F}} = 9.3$  Hz), 130.0, 129.2, 128.0, 115.7 (d,  $J_{\text{C-F}} = 21.8$  Hz), 52.2, 52.1, 51.4, 38.1, 33.2, 27.1, 23.8; IR (KBr): 2952, 1735, 1717, 1464, 1410, 1157, 840  $\text{cm}^{-1}$ ; HRMS (ESI): calcd. for  $\text{C}_{22}\text{H}_{23}\text{FNaO}_5$ :  $m/z$  409.1427  $[\text{M}+\text{Na}]^+$ , found: 409.1418  $[\text{M}+\text{Na}]^+$ .

**Dimethyl 2-cyclohexylmalonate (7g)<sup>4</sup>**

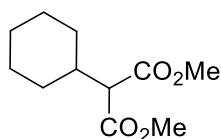

Colorless oil, 52% isolated yield (22.3 mg, 0.10 mmol).  $^1\text{H}$  NMR (500 MHz,  $\text{CDCl}_3$ ):  $\delta$  3.73 (s, 6H), 3.19 (d,  $J = 9.2$  Hz, 1H), 2.12–2.02 (m, 1H), 1.74–1.65 (m, 5H), 1.34–1.24 (m, 2H), 1.18–1.13 (m, 1H), 1.08–1.00 (m, 2H);  $^{13}\text{C}$  NMR (125 MHz,  $\text{CDCl}_3$ ):  $\delta$  169.2, 58.1, 52.2, 38.0, 30.7, 26.0, 25.9.

**Methyl 4-(1-cyclohexyl-2-methoxy-2-oxoethyl)benzoate (8g)<sup>5</sup>**

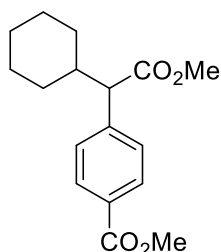

Performed at room temperature. Colorless oil, 55% isolated yield (31.9 mg, 0.11 mmol).  $^1\text{H}$  NMR (500 MHz,  $\text{CDCl}_3$ ):  $\delta$  7.98 (d,  $J = 8.3$  Hz, 2H), 7.41 (d,  $J = 8.3$  Hz, 2H), 3.90 (s, 1H), 3.65 (s, 3H), 3.30 (d,  $J = 10.6$  Hz, 3H), 2.06–1.99 (m, 1H), 1.81–1.59 (m, 5H),

1.37–1.32 (m, 1H), 1.15–1.04 (m, 3H), 0.78–0.73 (m, 1H);  $^{13}\text{C}$  NMR (125 MHz,  $\text{CDCl}_3$ ):  $\delta$  173.8, 166.9, 143.1, 129.7, 129.1, 128.7, 58.8, 52.1, 51.9, 41.2, 31.9, 30.4, 28.2, 25.9.

## 4. Control experiment

### Radical trapping experiment (Scheme 4)

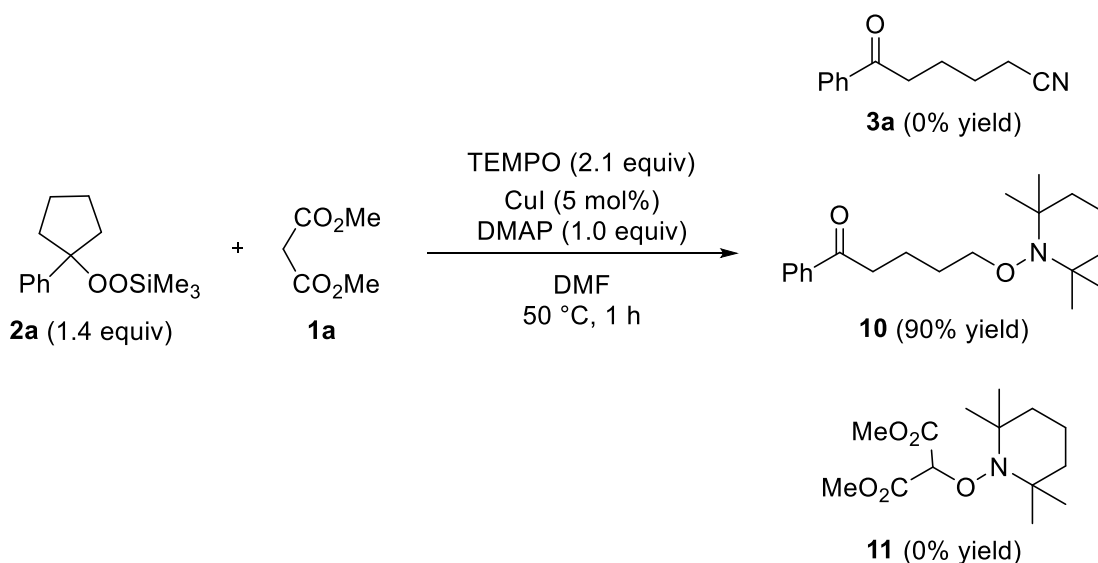

To a solution of CuI (1.9 mg, 5 mol%), DMAP (24.4 mg, 1.0 equiv), dimethyl malonate **1a** (26.4 mg, 0.2 mmol) and 2,2,6,6-tetramethylpiperidine 1-oxyl (TEMPO) (65.6 mg, 2.1 equiv) in dry DMF (1.0 mL) was added a solution of alkylsilyl peroxide **2a** (70.0 mg, 1.4 equiv) in dry DMF (1.0 mL) slowly at 50 °C. After stirring at 50 °C for 1 h, the reaction mixture was diluted with the mixture of AcOEt/hexane (volume ratio, 1:3) and washed with H<sub>2</sub>O three times. The organic layer was dried over Na<sub>2</sub>SO<sub>4</sub>, filtrated and concentrated under reduced pressure. The residue was analyzed by <sup>1</sup>H NMR for the determination of NMR yields of **3a**, **10** and **11** using CH<sub>3</sub>NO<sub>2</sub> as an internal standard. The crude product was purified by flash column chromatography on silica gel (eluted with AcOEt/hexane = 1:5) to afford TEMPO adduct of **10**.

#### 1-Phenyl-5-((2,2,6,6-tetramethylpiperidin-1-yl)oxy)pentan-1-one (**10**)<sup>6</sup>

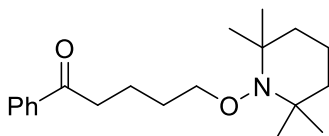

Colorless oil, 92% isolated yield (81.7 mg, 0.26 mmol). <sup>1</sup>H NMR (400 MHz, CDCl<sub>3</sub>): δ 7.97 (d, *J* = 8.2 Hz, 2H), 7.56 (t, 1H), 7.46 (t, *J* = 7.6 Hz, 2H), 3.79 (t, *J* = 6.4 Hz, 2H), 3.02 (t, *J* = 7.2 Hz, 2H), 1.86–1.83 (m, 2H), 1.65–1.61 (m, 2H), 1.44–1.42 (m, 2H), 1.15 (s, 6H), 1.09 (s, 6H); <sup>13</sup>C NMR (100 MHz, CDCl<sub>3</sub>): δ 200.4, 137.1, 132.9, 128.6, 128.1, 76.6, 59.7, 39.6, 38.7, 33.1, 28.5, 21.5, 20.2, 17.2.

## 5. References

- (1) R. Sakamoto, S. Sakurai and K. Maruoka. *Chem, Eur. J.*, 2017, **23**, 9030–9033.
- (2) T. Seihara, S. Sakurai, T. Kato, R. Sakamoto and K. Maruoka. *Org. Lett.*, 2019, **21**, 2477–2481.
- (3) H. Abas, C. S. Frampton and A. C. Spivey, *J. Org. Chem.*, 2016, **81**, 9947–9956.
- (4) B. D. McLarney, S. Hanna, D. G. Musaev and S. France, *ACS Catal.*, 2019, **9**, 4526–4538.
- (5) K. Kobayashi, Y. Yamamoto and N. Miyaoura, *Organometallics*, 2011, **30**, 6323–6327.
- (6) R. Sakamoto, T. Kato, S. Sakurai and K. Maruoka, *Org. Lett.*, 2018, **20**, 1400–1403.

## 6. $^1\text{H}$ NMR and $^{13}\text{C}$ NMR Spectra

### NMR Spectra of dimethyl 2-(5-oxo-5-phenylpentyl)malonate (**3a**)

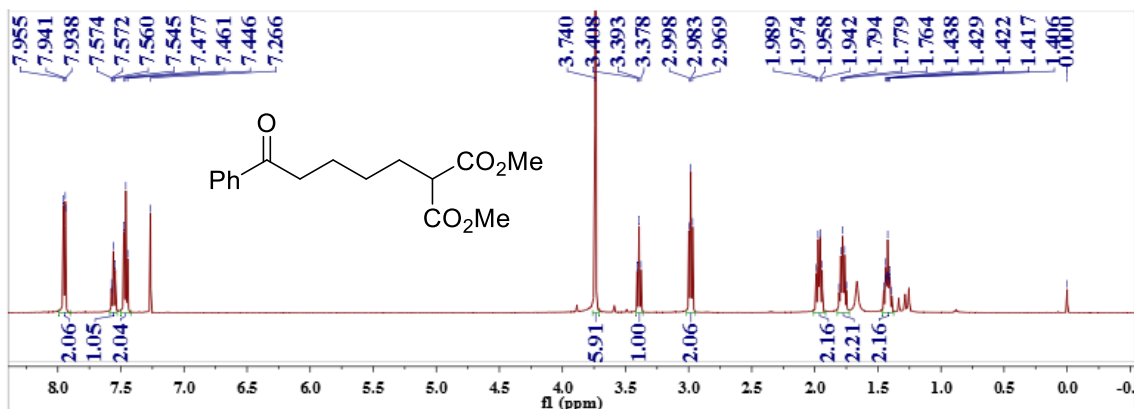

$^1\text{H}$  NMR (500 MHz,  $\text{CDCl}_3$ ) spectrum of **3a**

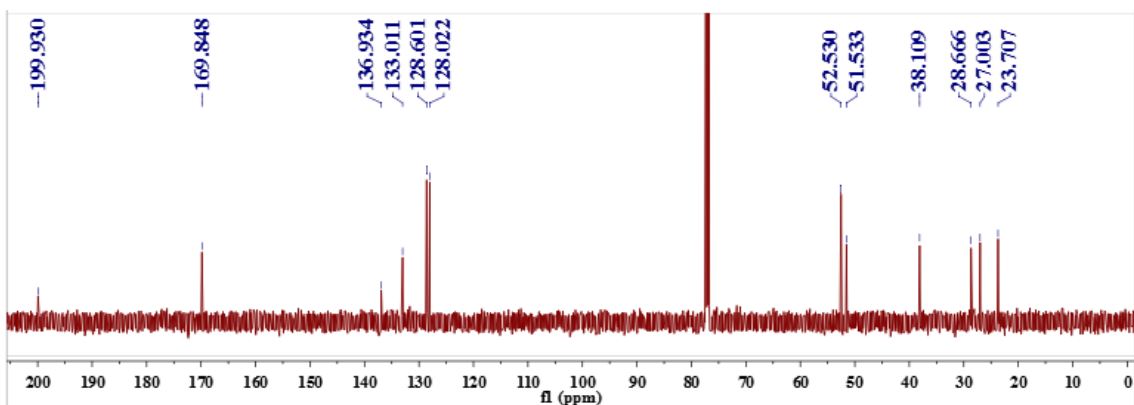

$^{13}\text{C}$  NMR (125 MHz,  $\text{CDCl}_3$ ) spectrum of **3a**

### NMR Spectra of dimethyl 2-methyl-2-(5-oxo-5-phenylpentyl)malonate (**5**)

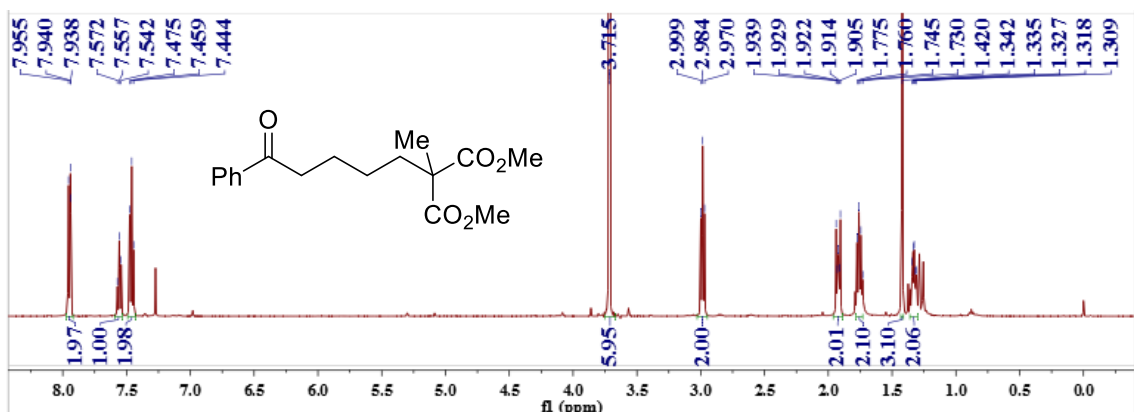

$^1\text{H}$  NMR (500 MHz,  $\text{CDCl}_3$ ) spectrum of **5**

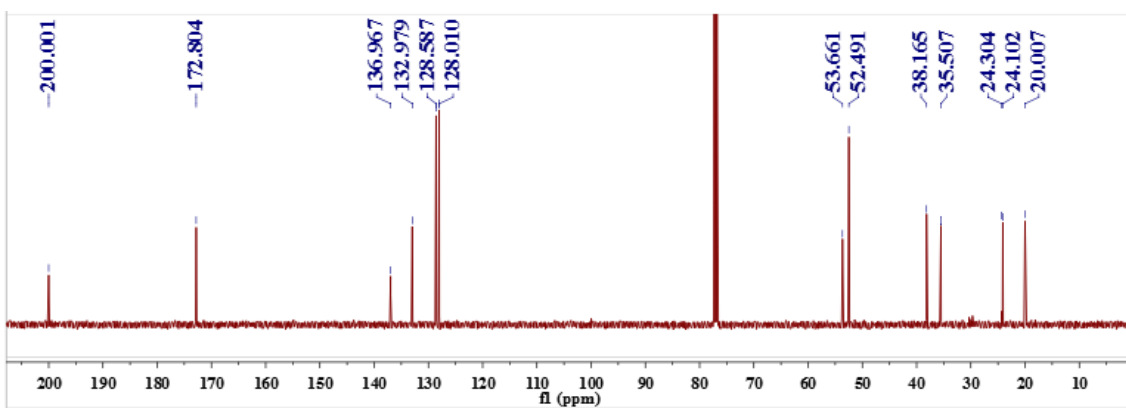

<sup>13</sup>C NMR (125 MHz, CDCl<sub>3</sub>) spectrum of **5**

NMR Spectra of dimethyl 2,2-bis(5-oxo-5-phenylpentyl)malonate (**6**)

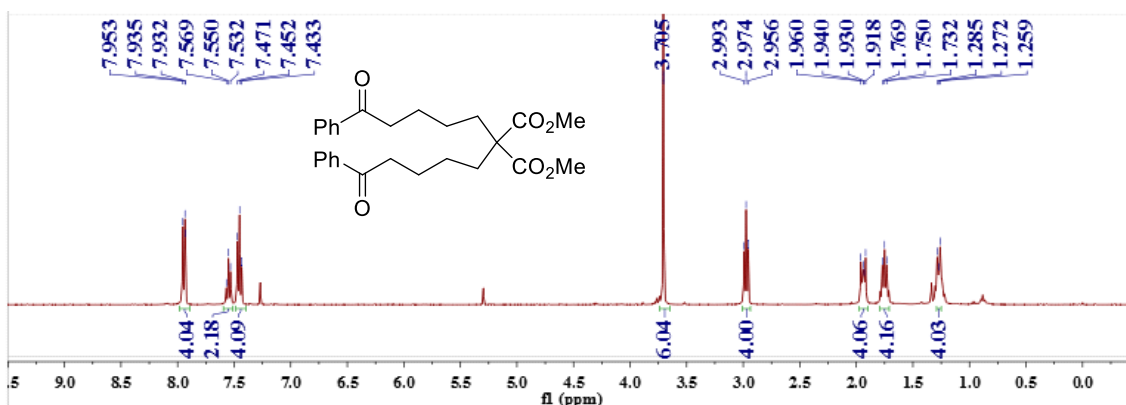

<sup>1</sup>H NMR (400 MHz, CDCl<sub>3</sub>) spectrum of **6**

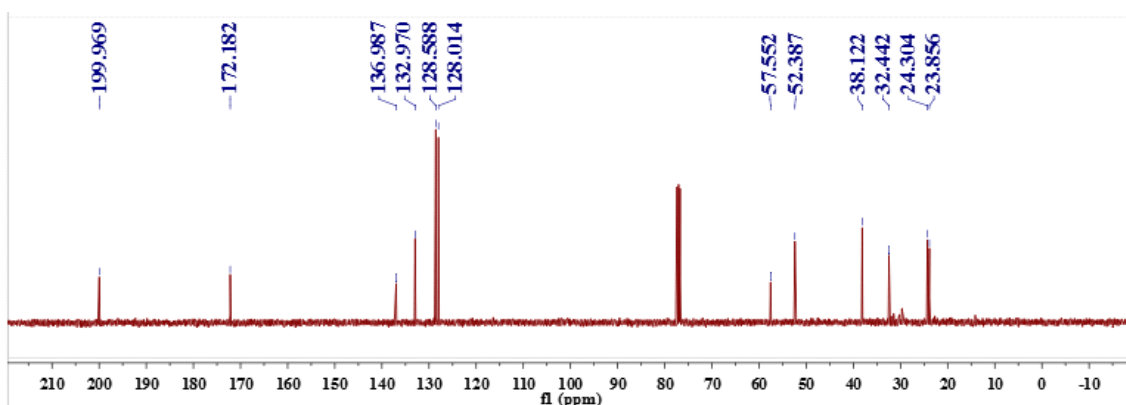

<sup>13</sup>C NMR (100 MHz, CDCl<sub>3</sub>) spectrum of **6**

### NMR Spectra of methyl 7-oxo-7-phenyl-2-(phenylsulfonyl)heptanoate (3b)

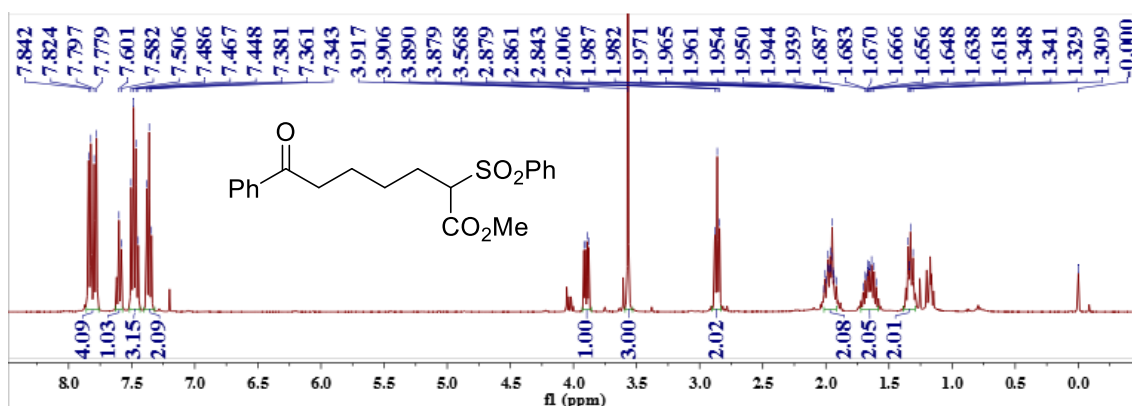

<sup>1</sup>H NMR (400 MHz, CDCl<sub>3</sub>) spectrum of **3b**

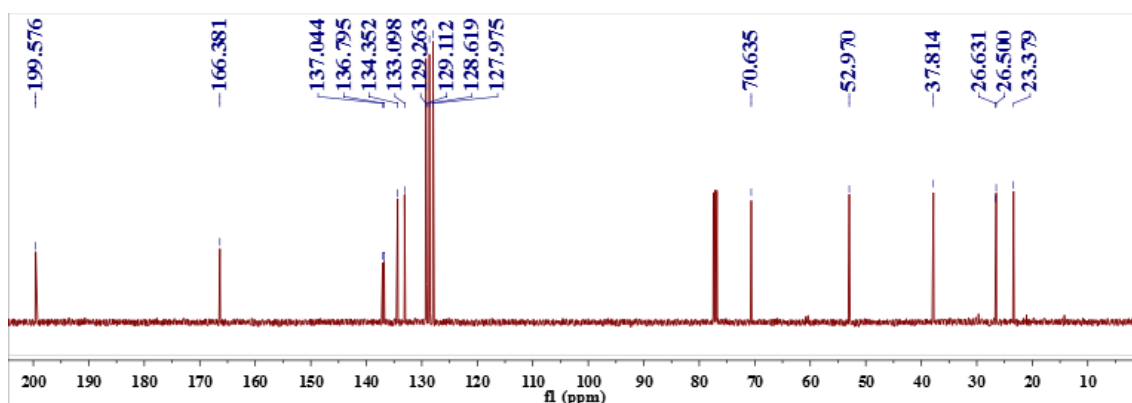

<sup>13</sup>C NMR (100 MHz, CDCl<sub>3</sub>) spectrum of **3b**

### NMR Spectra of methyl 2-acetyl-7-oxo-7-phenylheptanoate (3c)

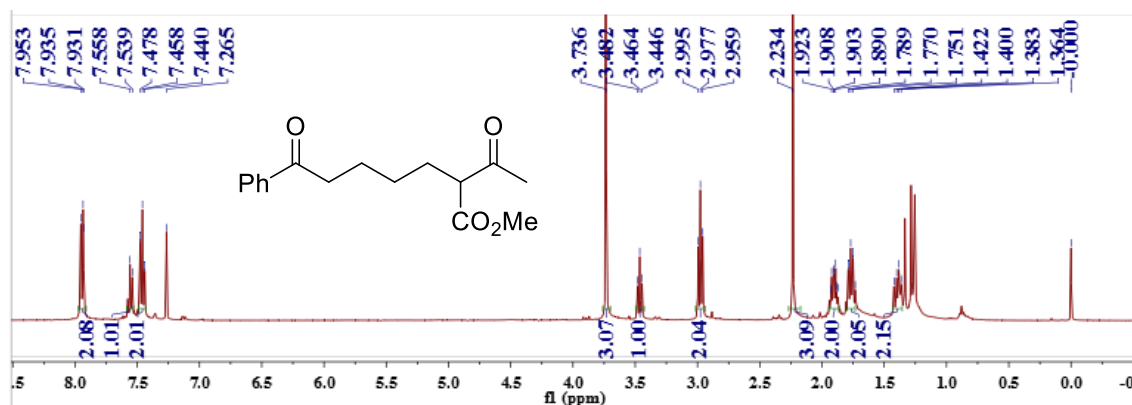

<sup>1</sup>H NMR (400 MHz, CDCl<sub>3</sub>) spectrum of **3c**

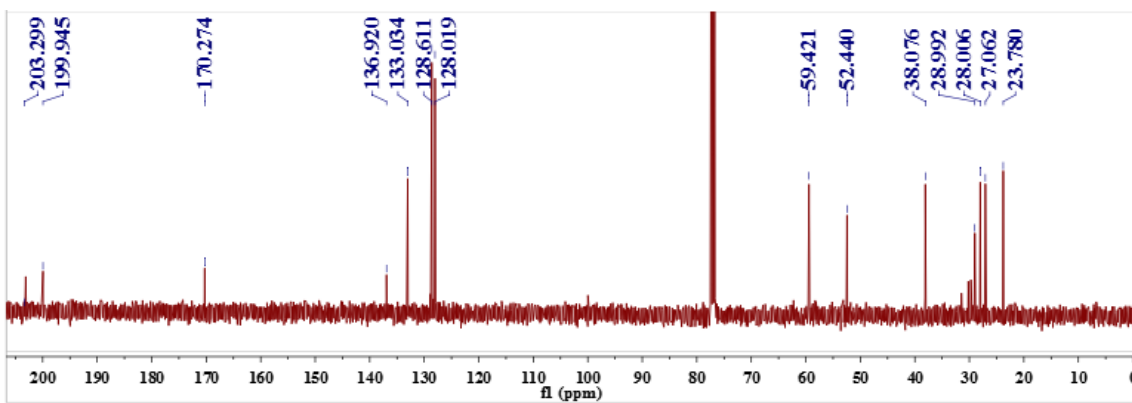

$^{13}\text{C}$  NMR (100 MHz,  $\text{CDCl}_3$ ) spectrum of **3c**

**NMR Spectra of methyl 2-cyano-7-oxo-7-phenylheptanoate (3d)**

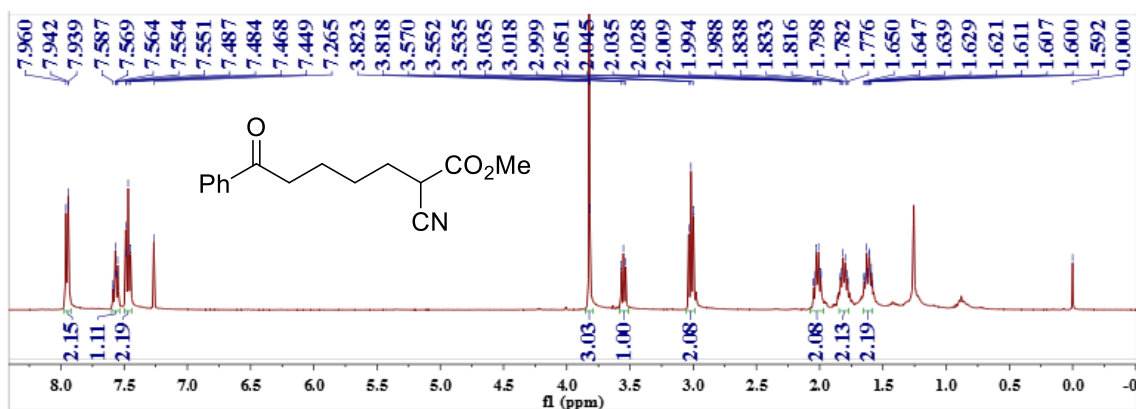

$^1\text{H}$  NMR (400 MHz,  $\text{CDCl}_3$ ) spectrum of **3d**

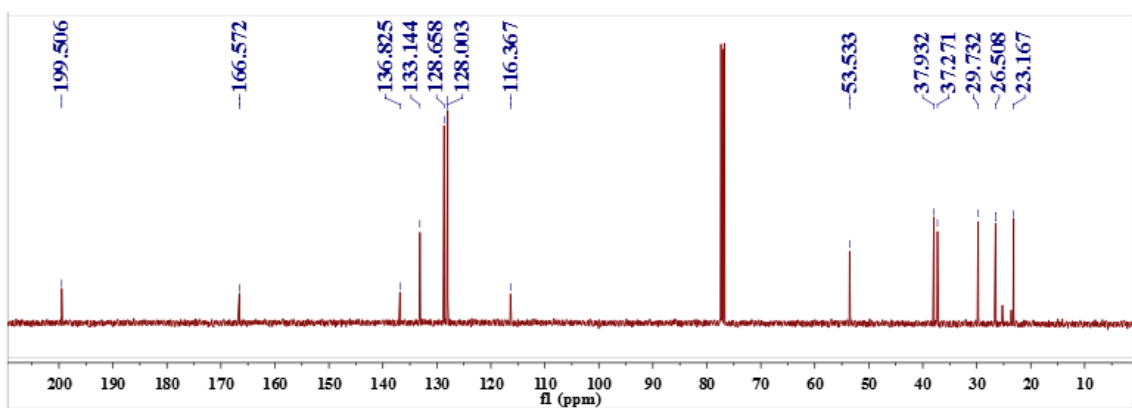

$^{13}\text{C}$  NMR (100 MHz,  $\text{CDCl}_3$ ) spectrum of **3d**



### NMR Spectra of methyl 2-(diethylcarbamoyl)-7-oxo-7-phenylheptanoate (3e)

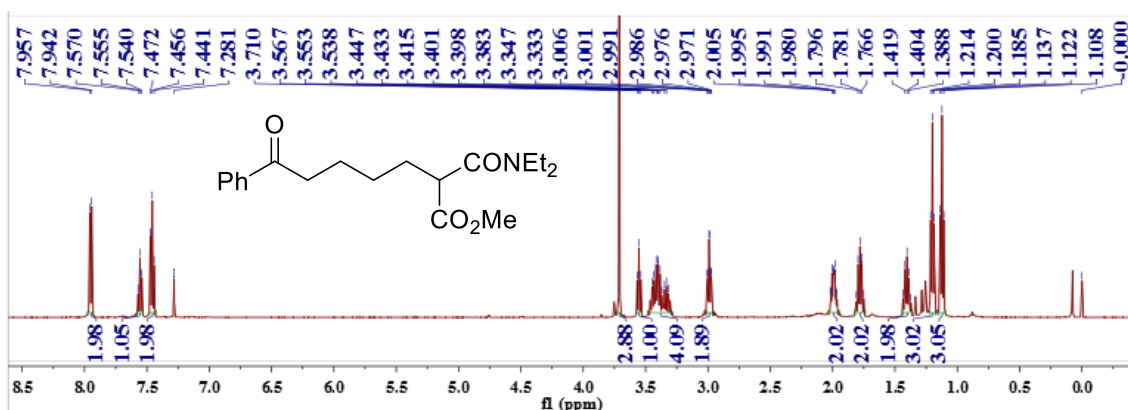

<sup>1</sup>H NMR (400 MHz, CDCl<sub>3</sub>) spectrum of 3e

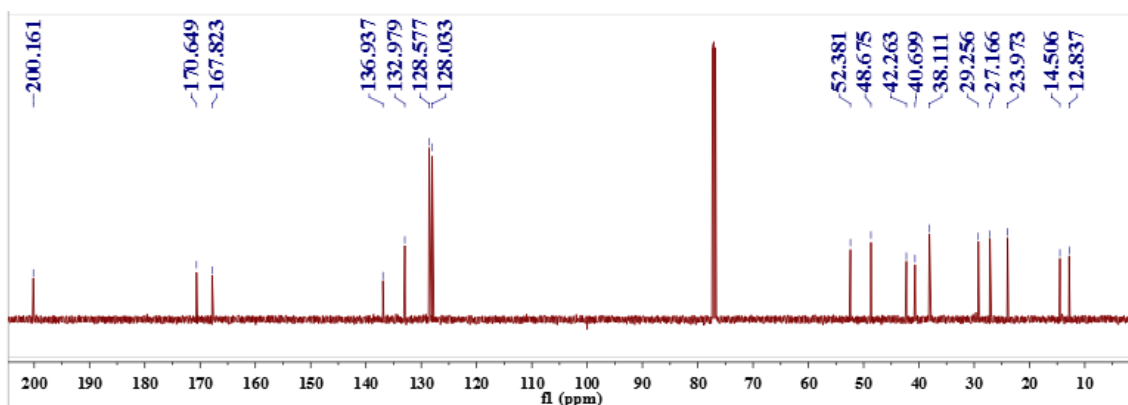

<sup>13</sup>C NMR (100 MHz, CDCl<sub>3</sub>) spectrum of 3e

### NMR Spectra of 1-phenyl-6,6-bis(phenylsulfonyl)hexan-1-one (3f)

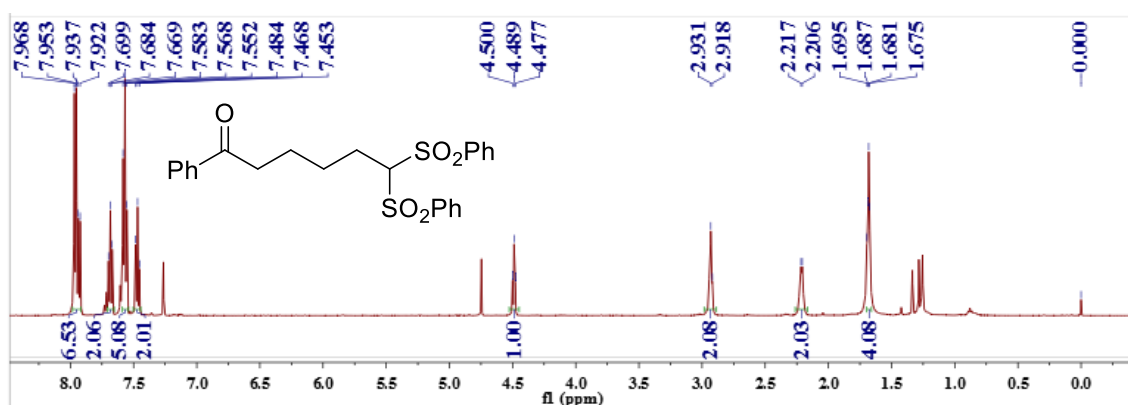

<sup>1</sup>H NMR (500 MHz, CDCl<sub>3</sub>) spectrum of 3f

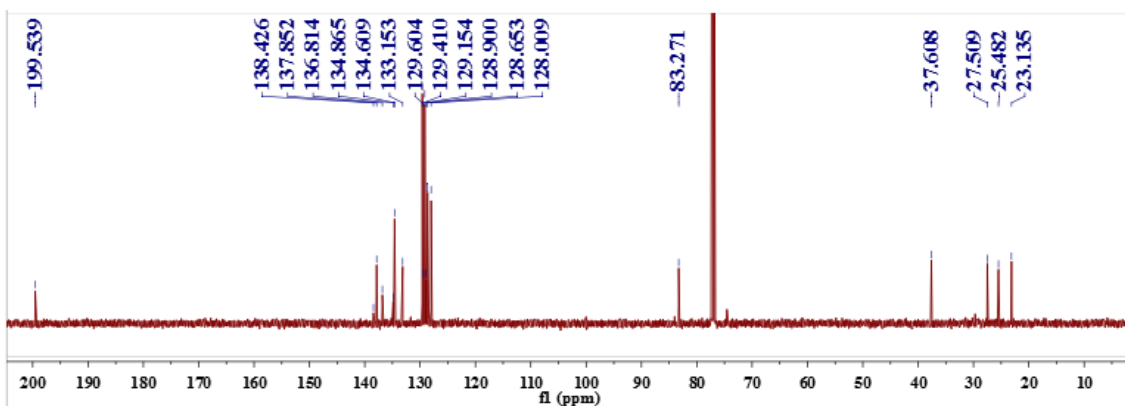

$^{13}\text{C}$  NMR (125 MHz,  $\text{CDCl}_3$ ) spectrum of **3f**

NMR Spectra of methyl 4-(1-methoxy-1,7-dioxo-7-phenylheptan-2-yl)benzoate (**3g**)

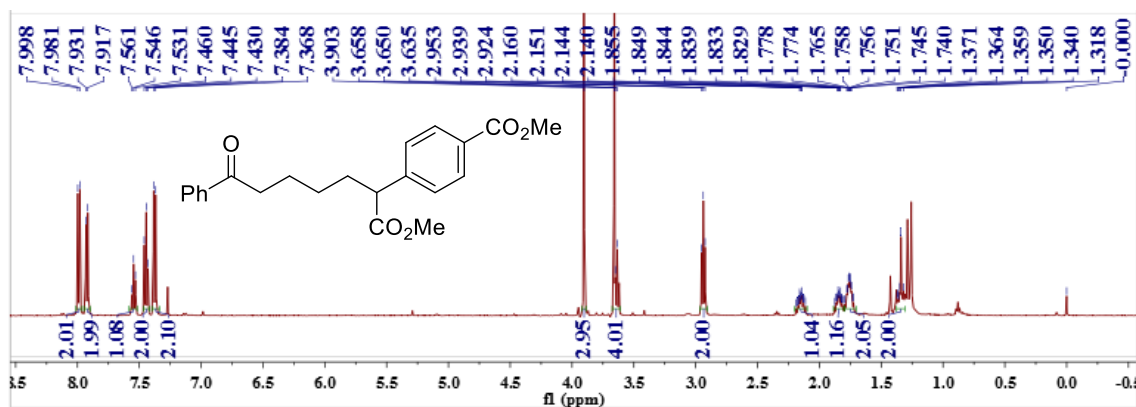

$^1\text{H}$  NMR (500 MHz,  $\text{CDCl}_3$ ) spectrum of **3g**

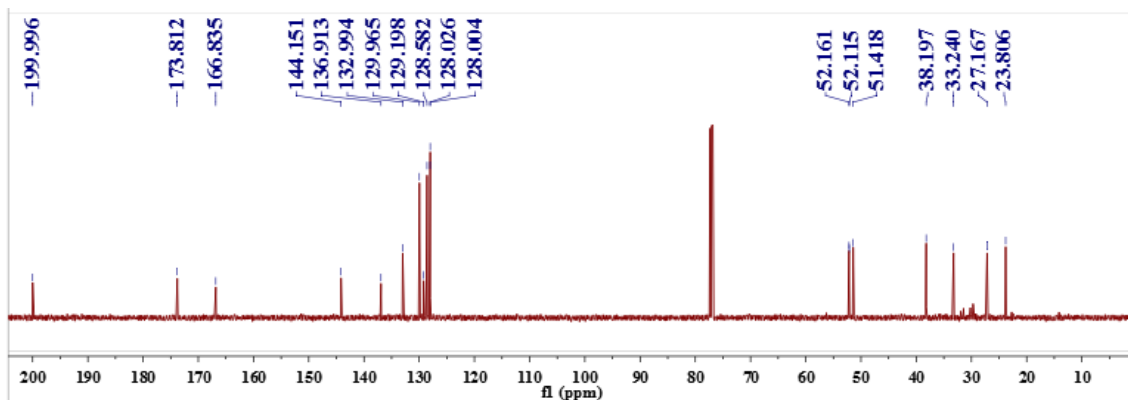

$^{13}\text{C}$  NMR (125 MHz,  $\text{CDCl}_3$ ) spectrum of **3g**

### NMR Spectra of 6,6-bis(4-nitrophenyl)-1-phenylhexan-1-one (3h)

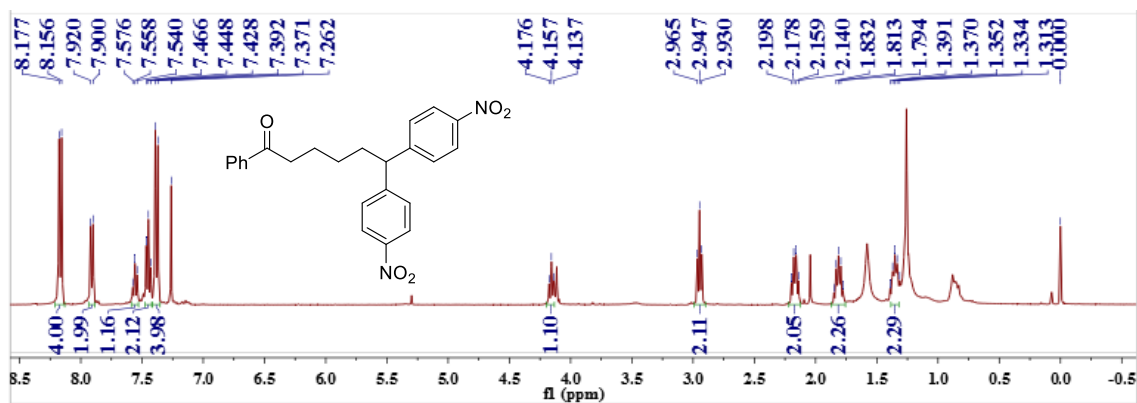

<sup>1</sup>H NMR (400 MHz, CDCl<sub>3</sub>) spectrum of **3h**

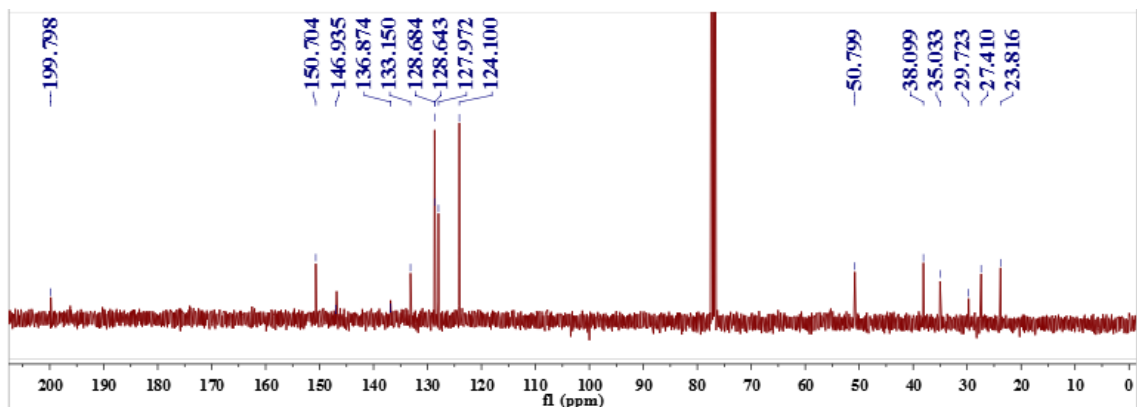

<sup>13</sup>C NMR (100 MHz, CDCl<sub>3</sub>) spectrum of **3h**

### NMR Spectra of dimethyl 2-(6-oxo-6-phenylhexyl)malonate (7b)

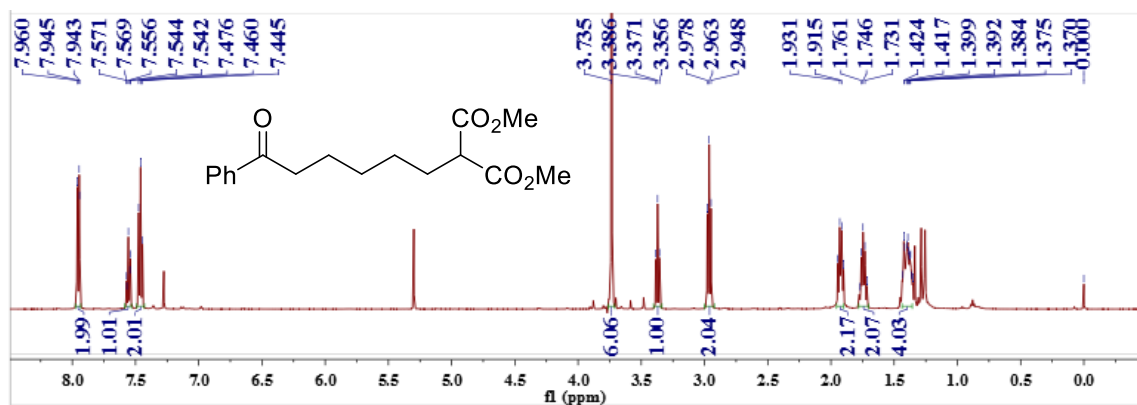

<sup>1</sup>H NMR (500 MHz, CDCl<sub>3</sub>) spectrum of **7b**

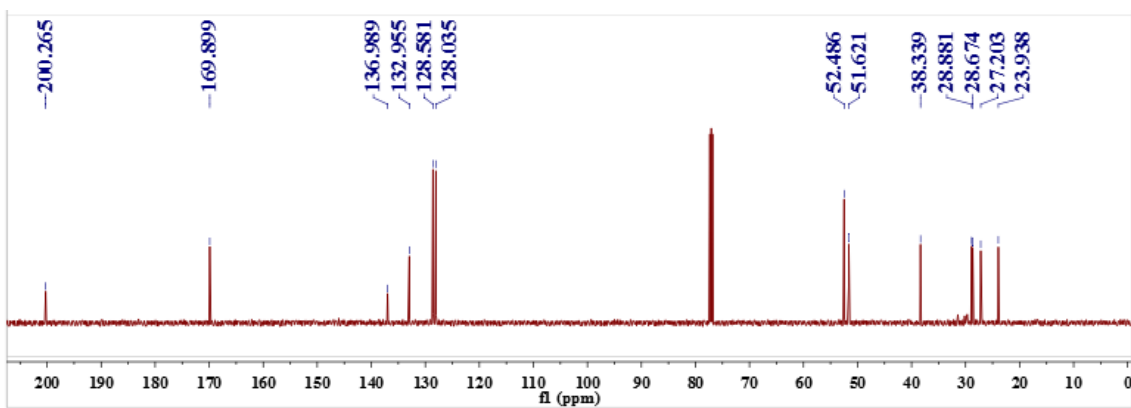

$^{13}\text{C}$  NMR (125 MHz,  $\text{CDCl}_3$ ) spectrum of **7b**

NMR Spectra of methyl 4-(1-methoxy-1,8-dioxo-8-phenyloctan-2-yl)benzoate (**8b**)

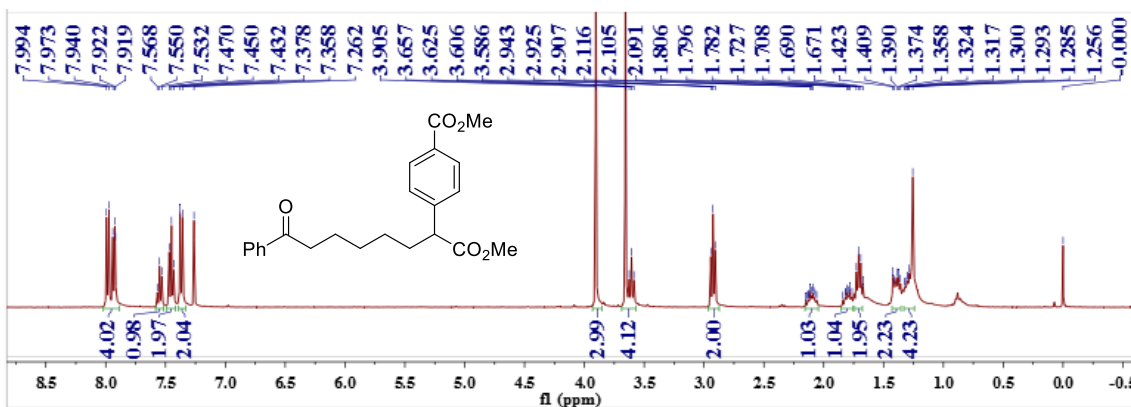

$^1\text{H}$  NMR (400 MHz,  $\text{CDCl}_3$ ) spectrum of **8b**

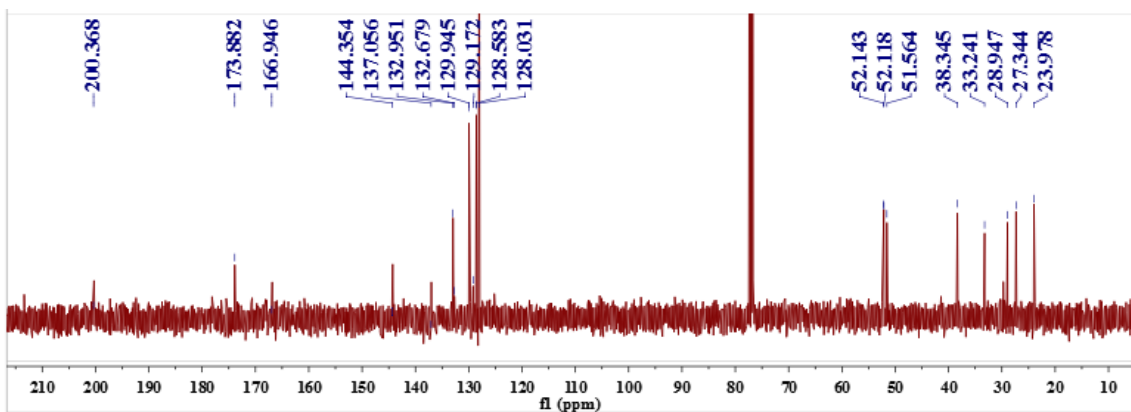

$^{13}\text{C}$  NMR (100 MHz,  $\text{CDCl}_3$ ) spectrum of **8b**

### NMR Spectra of dimethyl 2-(2-(3-oxo-3-phenylpropoxy)ethyl)malonate (7c)

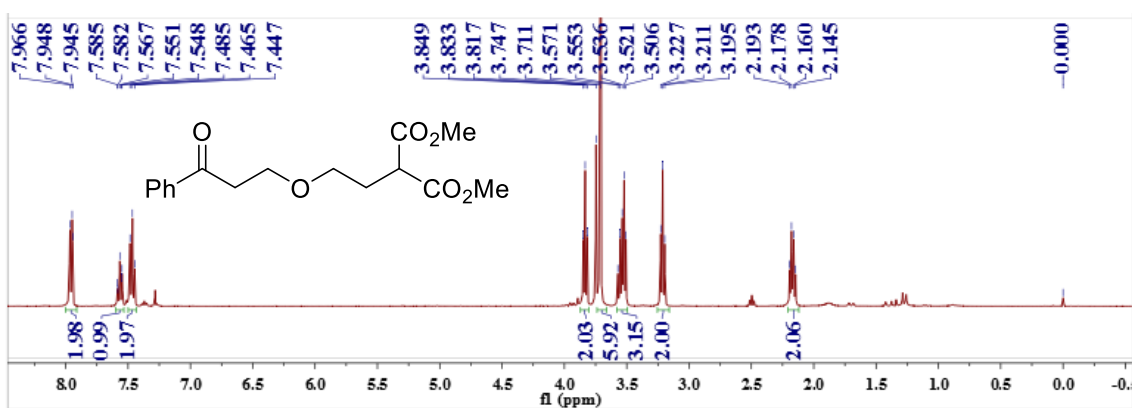

<sup>1</sup>H NMR (400 MHz, CDCl<sub>3</sub>) spectrum of 7c

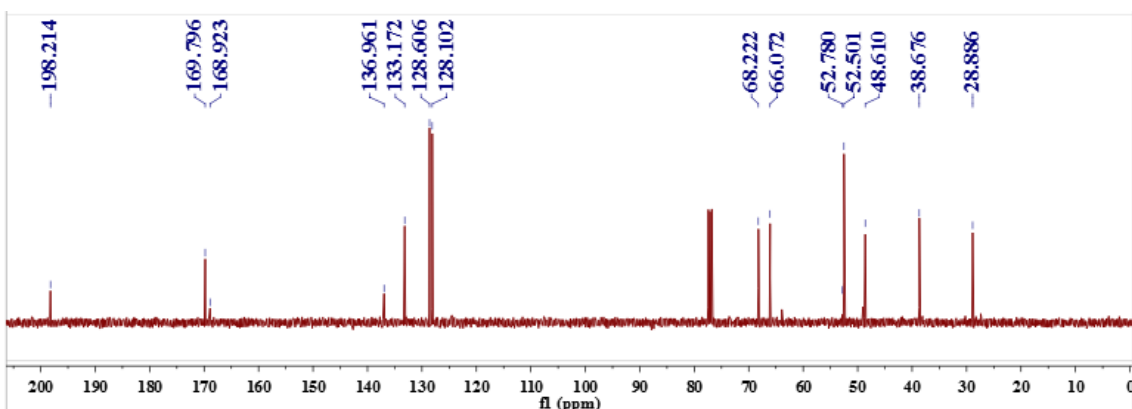

<sup>13</sup>C NMR (100 MHz, CDCl<sub>3</sub>) spectrum of 7c

### NMR Spectra of methyl 4-(3-oxo-3-phenylpropoxy)-2-(phenylsulfonyl)butanoate (9c)

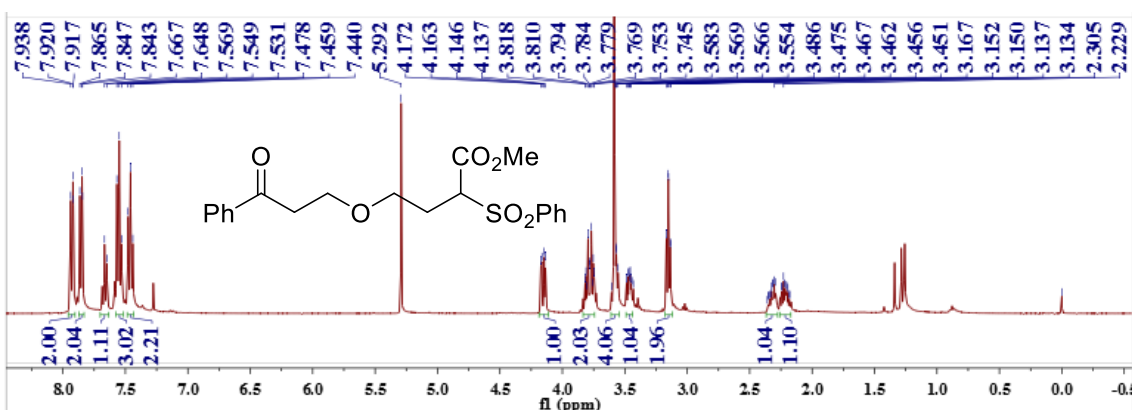

<sup>1</sup>H NMR (400 MHz, CDCl<sub>3</sub>) spectrum of 9c

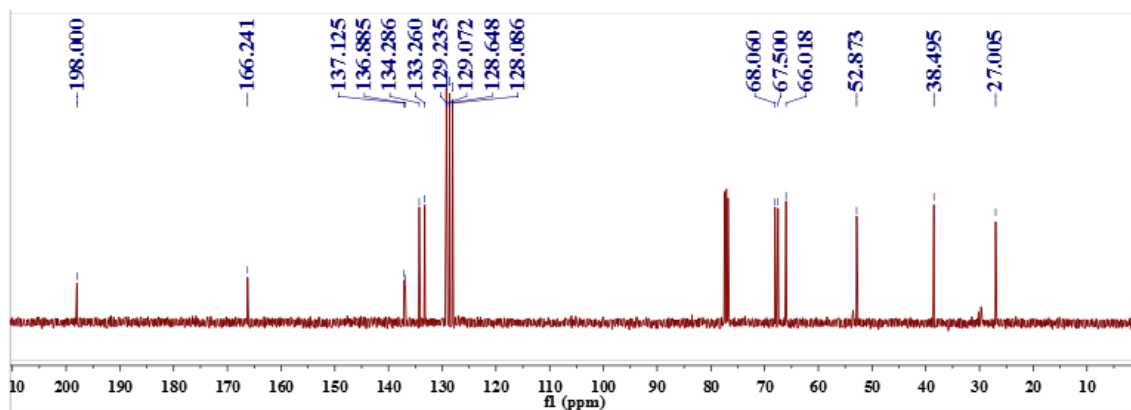

$^{13}\text{C}$  NMR (100 MHz,  $\text{CDCl}_3$ ) spectrum of **9c**

NMR Spectra of dimethyl 2-(7-oxo-7-phenylheptyl)malonate (**7d**)

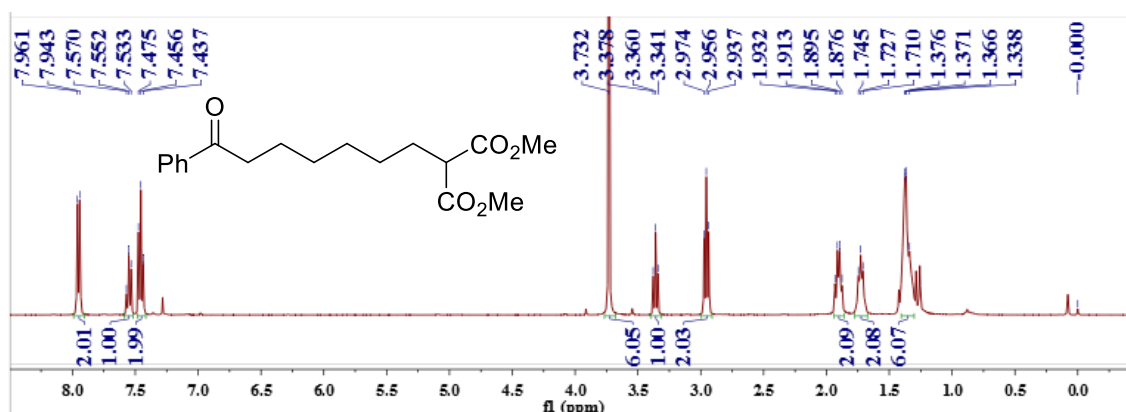

$^1\text{H}$  NMR (400 MHz,  $\text{CDCl}_3$ ) spectrum of **7d**

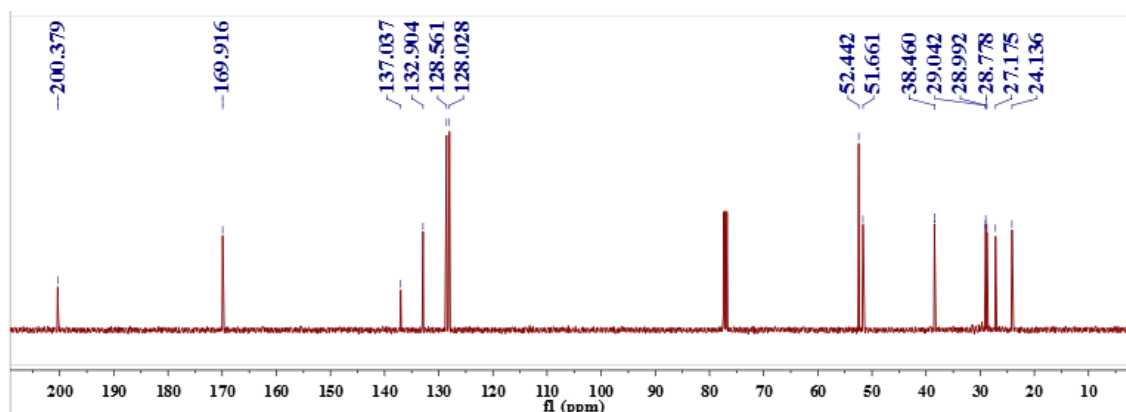

$^{13}\text{C}$  NMR (100 MHz,  $\text{CDCl}_3$ ) spectrum of **7d**

### NMR Spectra of methyl 4-(1-methoxy-1,9-dioxo-9-phenylnonan-2-yl)benzoate (8d)

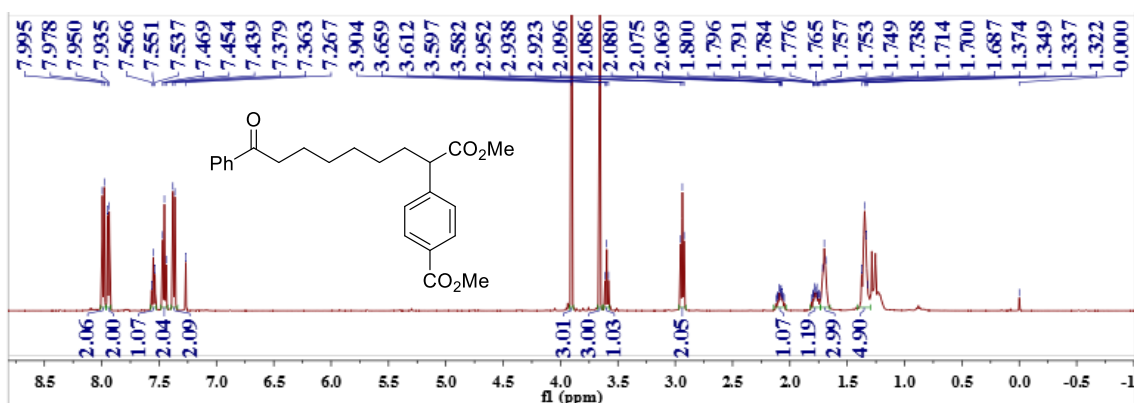

<sup>1</sup>H NMR (500 MHz, CDCl<sub>3</sub>) spectrum of **8d**

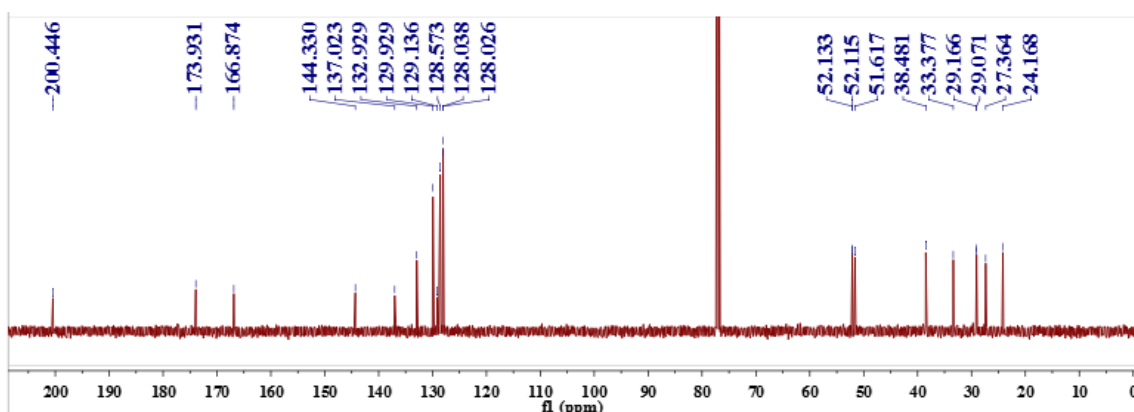

<sup>13</sup>C NMR (125 MHz, CDCl<sub>3</sub>) spectrum of **8d**

### NMR Spectra of methyl 9-oxo-9-phenyl-2-(phenylsulfonyl)nonanoate (9d)

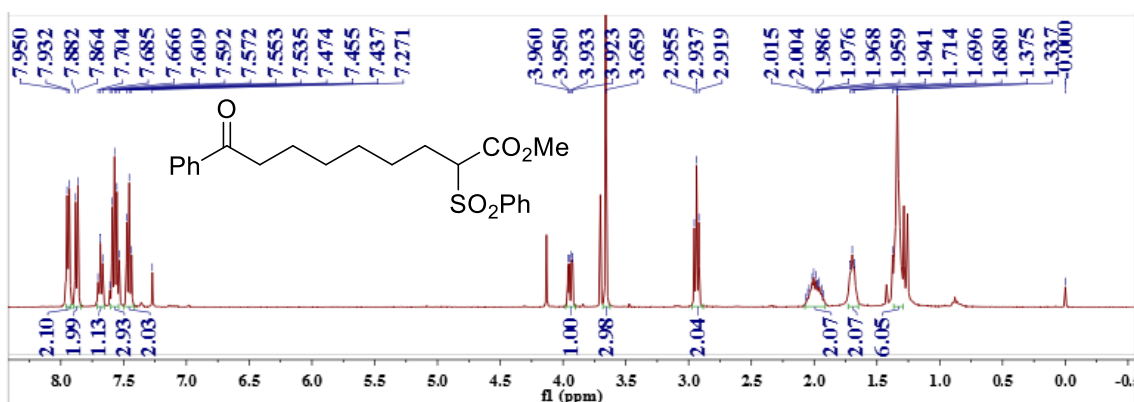

<sup>1</sup>H NMR (400 MHz, CDCl<sub>3</sub>) spectrum of **9d**

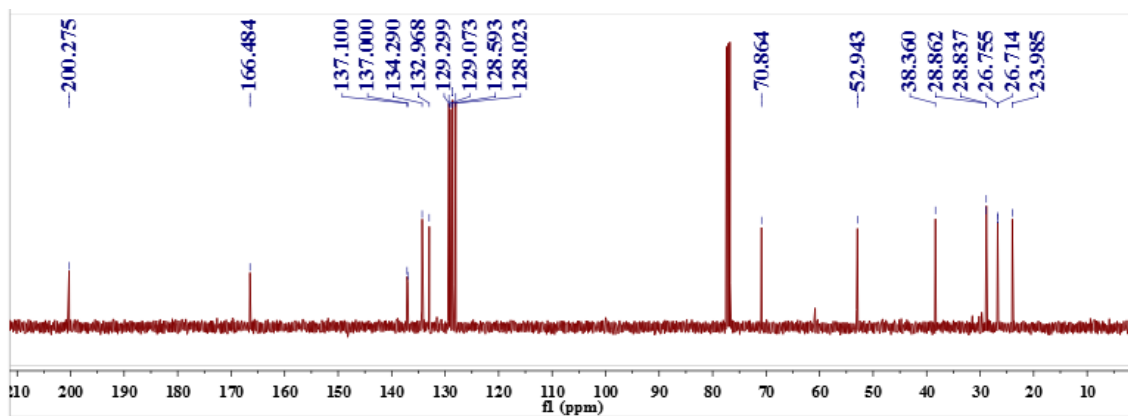

$^{13}\text{C}$  NMR (100 MHz,  $\text{CDCl}_3$ ) spectrum of **9d**

NMR Spectra of dimethyl 2-(5-oxo-5-(p-tolyl)pentyl)malonate (**7e**)

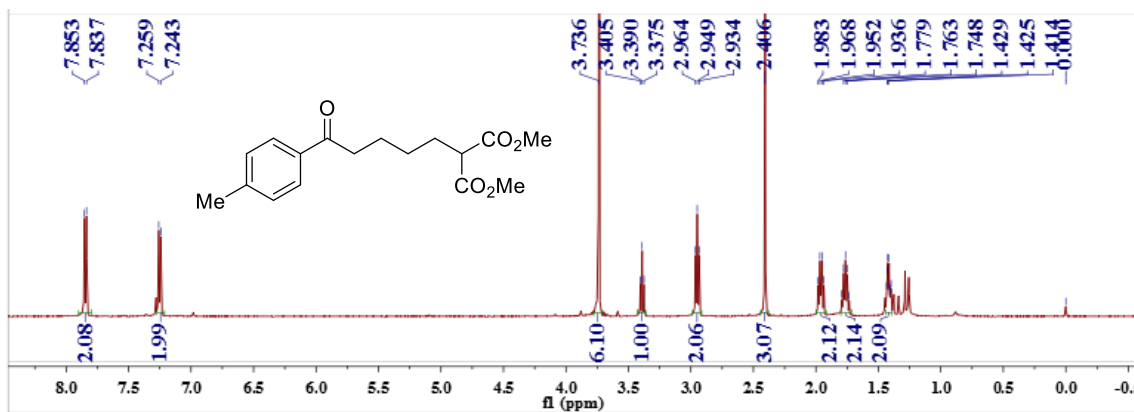

$^1\text{H}$  NMR (500 MHz,  $\text{CDCl}_3$ ) spectrum of **7e**

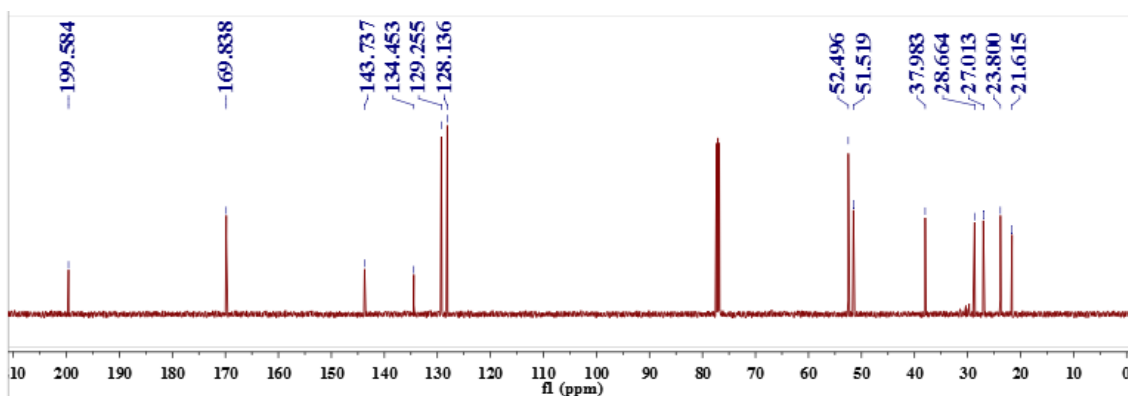

$^{13}\text{C}$  NMR (125 MHz,  $\text{CDCl}_3$ ) spectrum of **7e**



**NMR Spectra of methyl 4-(1-methoxy-1,7-dioxo-7-(p-tolyl)heptan-2-yl)benzoate (8e)**

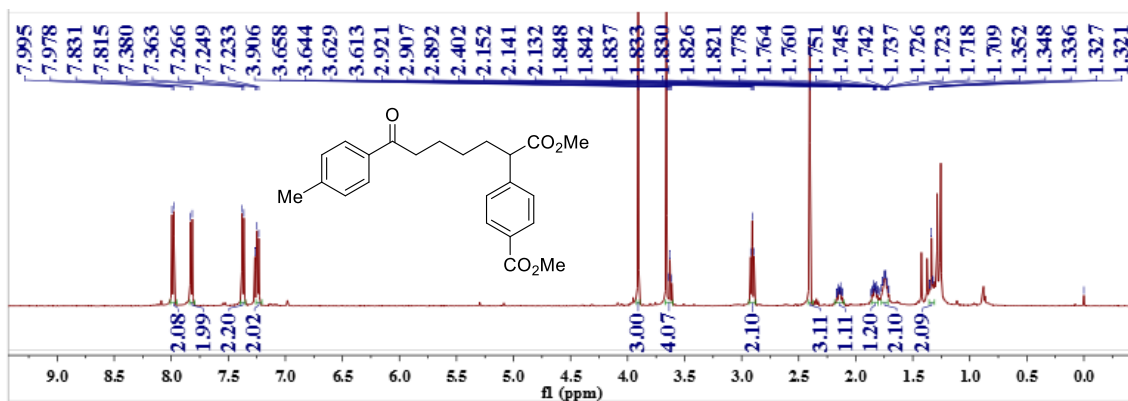

<sup>1</sup>H NMR (500 MHz, CDCl<sub>3</sub>) spectrum of 8e

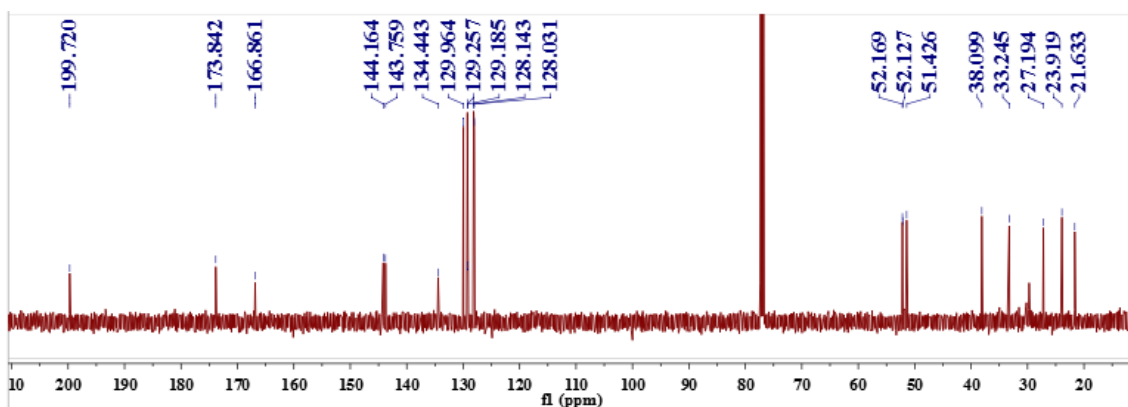

<sup>13</sup>C NMR (125 MHz, CDCl<sub>3</sub>) spectrum of 8e

**NMR Spectra of dimethyl 2-(5-(4-fluorophenyl)-5-oxopentyl)malonate (7f)**

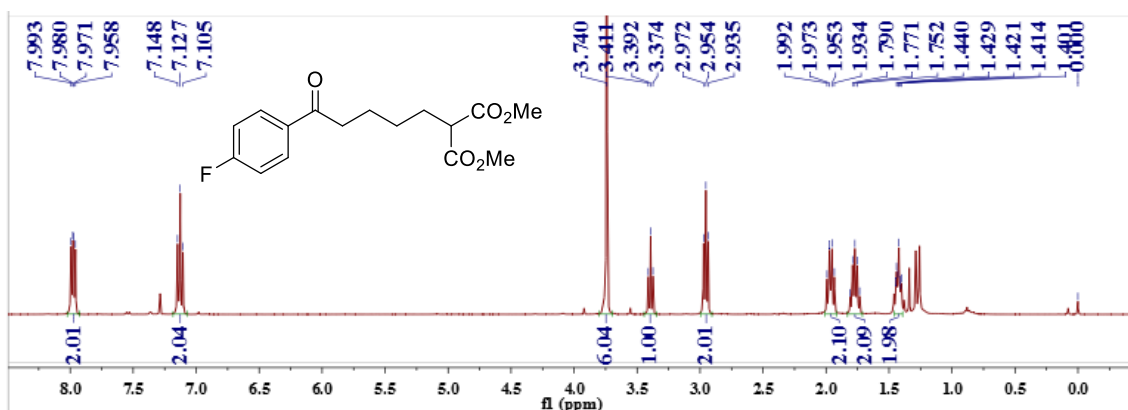

<sup>1</sup>H NMR (400 MHz, CDCl<sub>3</sub>) spectrum of 7f

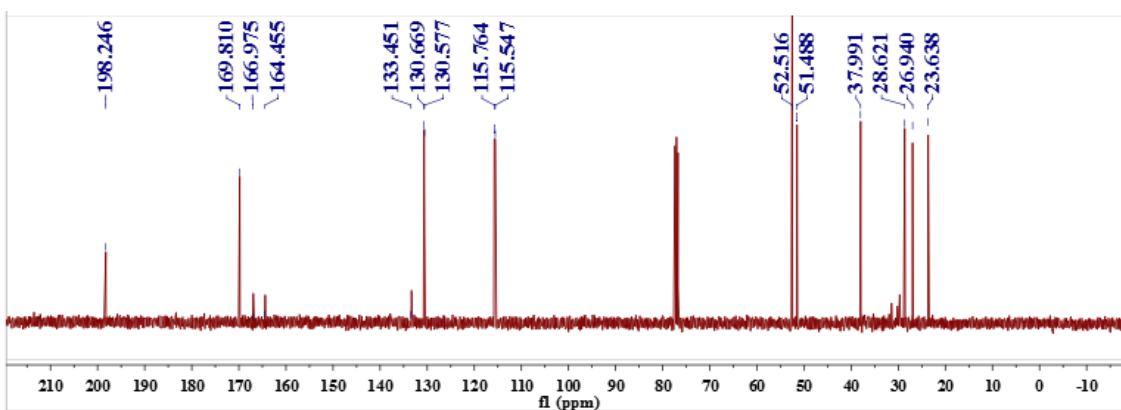

$^{13}\text{C}$  NMR (100 MHz,  $\text{CDCl}_3$ ) spectrum of **7f**

NMR Spectra of methyl 4-(7-(4-fluorophenyl)-1-methoxy-1,7-dioxoheptan-2-yl) benzoate (**8f**)

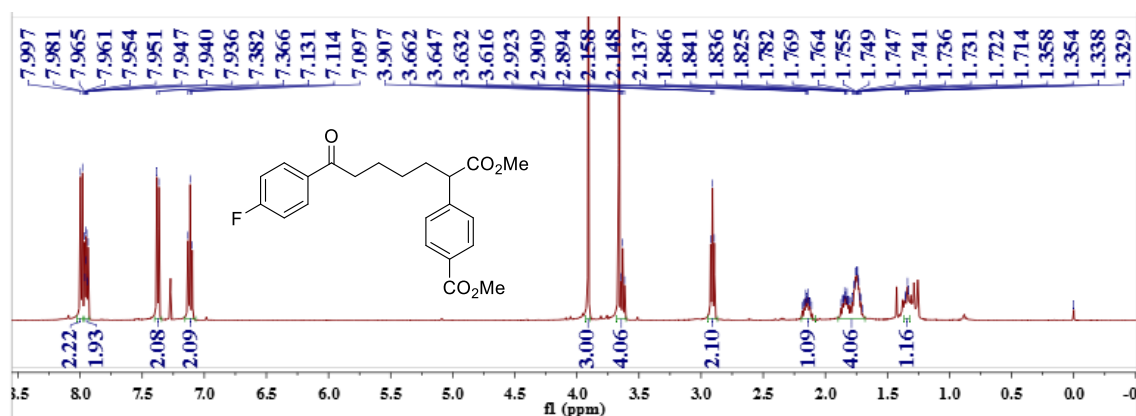

$^1\text{H}$  NMR (500 MHz,  $\text{CDCl}_3$ ) spectrum of **8f**

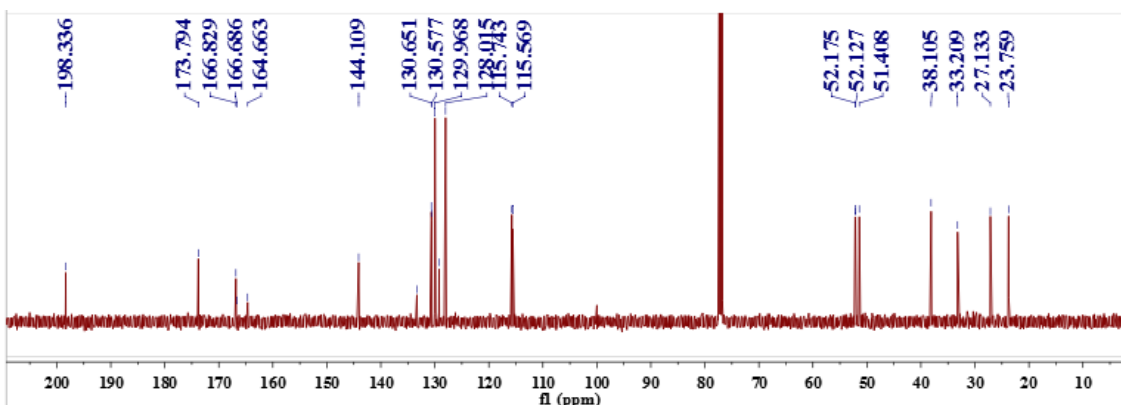

$^{13}\text{C}$  NMR (125 MHz,  $\text{CDCl}_3$ ) spectrum of **8f**

### NMR Spectra of dimethyl 2-cyclohexylmalonate (7g)

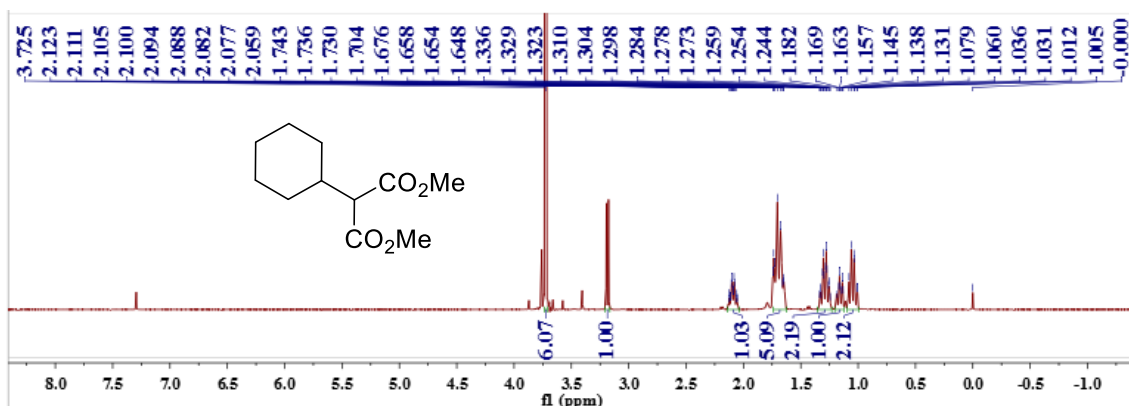

<sup>1</sup>H NMR (500 MHz, CDCl<sub>3</sub>) spectrum of 7g

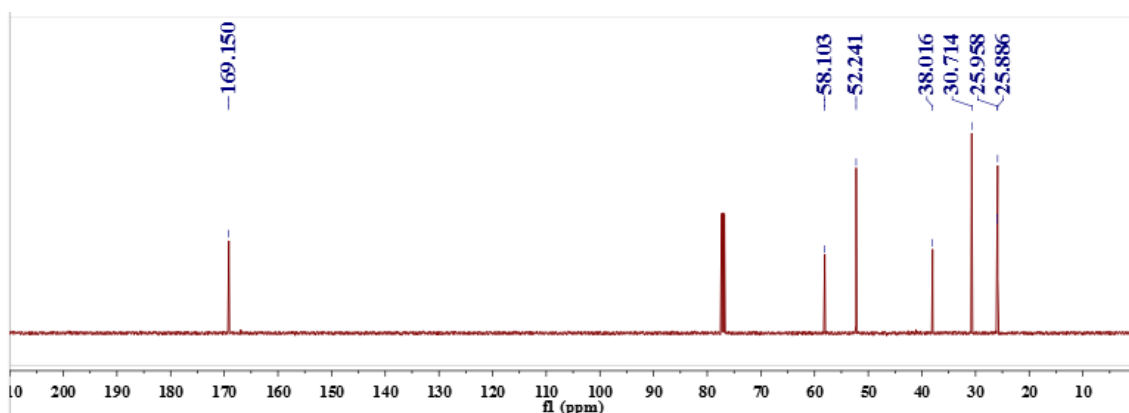

<sup>13</sup>C NMR (125 MHz, CDCl<sub>3</sub>) spectrum of 7g

### NMR Spectra of methyl 4-(1-cyclohexyl-2-methoxy-2-oxoethyl)benzoate (8g)

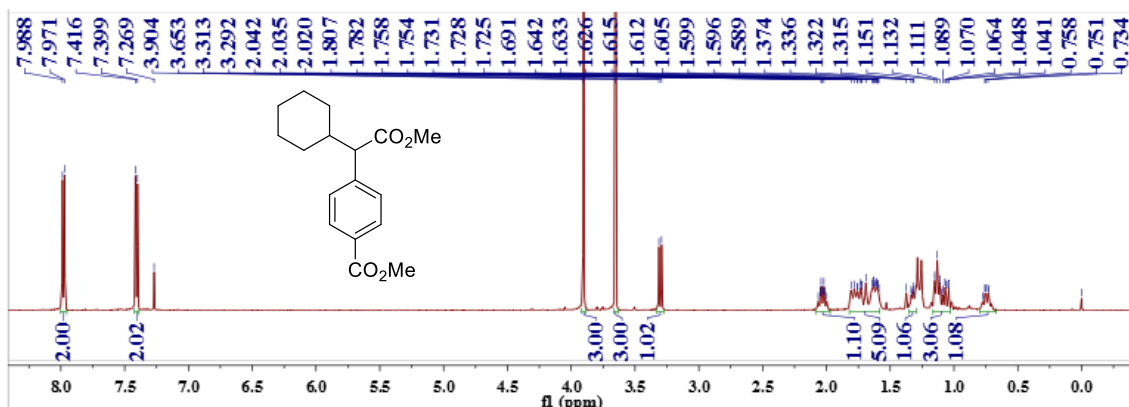

<sup>1</sup>H NMR (500 MHz, CDCl<sub>3</sub>) spectrum of 8g

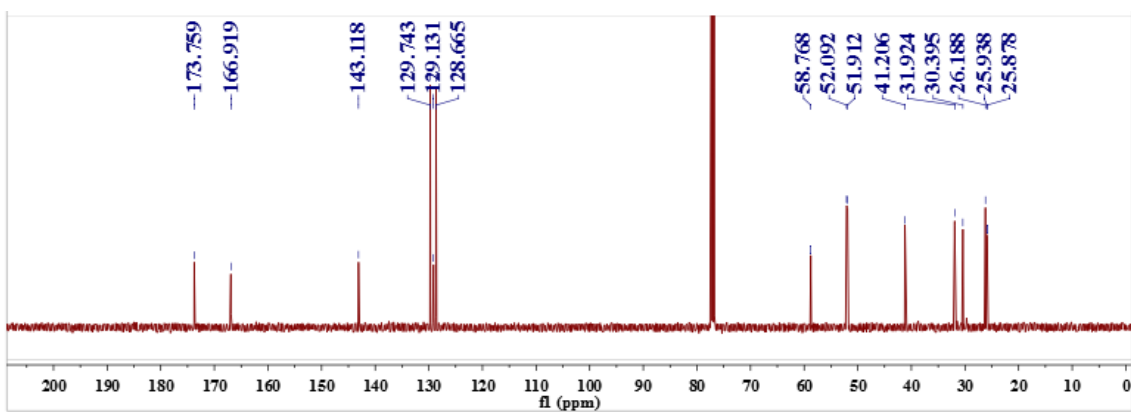

$^{13}\text{C}$  NMR (125 MHz,  $\text{CDCl}_3$ ) spectrum of **8g**

NMR spectra of 1-phenyl-5-((2,2,6,6-tetramethylpiperidin-1-yl)oxy)pentan-1-one (**10**)

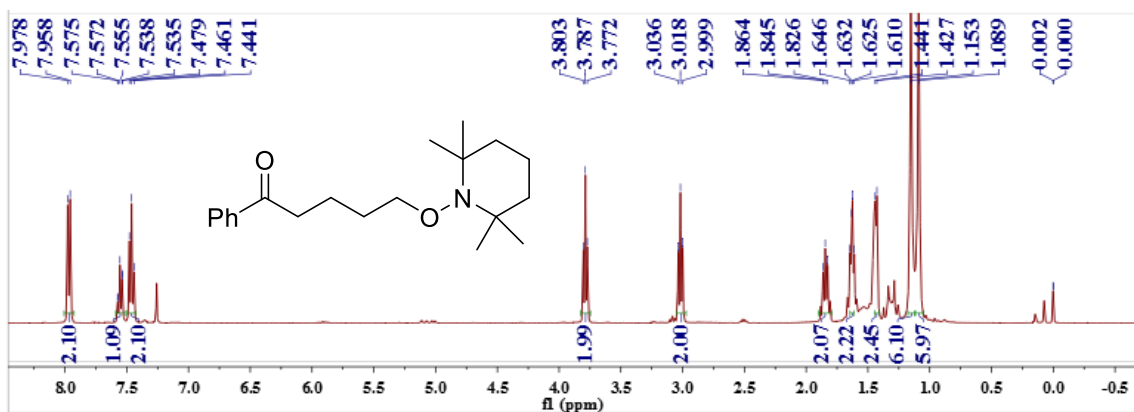

$^1\text{H}$  NMR (400 MHz,  $\text{CDCl}_3$ ) spectrum of **10**

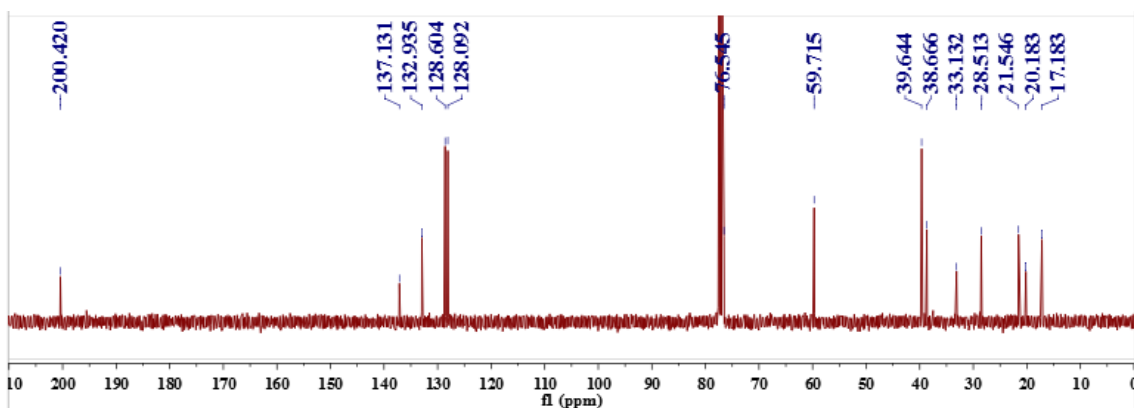

$^{13}\text{C}$  NMR (100 MHz,  $\text{CDCl}_3$ ) spectrum of **10**
